# Supplementary material for: Rifamycin-Related Polyketides from a Marine-Derived Bacterium Salinispora arenicola and Their Cytotoxic Activity
Source: MDPI journal article supplement (doi:10.3390/md21090494), 2023-09-15
Supplement: s1 [file s1]

# **Rifamycin-Related Polyketides from a Marine-Derived Bacterium *Salinispora arenicola* and Their Cytotoxic Activity**

**Cao Van Anh <sup>1,†</sup>, Jong Soon Kang <sup>2</sup>, Jeong-Wook Yang <sup>2</sup>, Joo-Hee Kwon <sup>2</sup>, Chang-Su Heo <sup>1,3</sup>, Hwa-Sun Lee <sup>1</sup>, and Hee Jae Shin <sup>1,3,\*</sup>**

## Contents

|                                                                                                                        |    |
|------------------------------------------------------------------------------------------------------------------------|----|
| <b>Figure S 1.</b> Structures of some analogs of the isolated compounds. ....                                          | 4  |
| <b>Figure S 2.</b> $^1\text{H}$ NMR spectrum of <b>1</b> . ....                                                        | 8  |
| <b>Figure S 3.</b> $^{13}\text{C}$ NMR spectrum of <b>1</b> . ....                                                     | 9  |
| <b>Figure S 4.</b> HSQC spectrum of <b>1</b> . ....                                                                    | 10 |
| <b>Figure S 5.</b> $^1\text{H}$ - $^1\text{H}$ COSY spectrum of <b>1</b> . ....                                        | 11 |
| <b>Figure S 6.</b> HMBC spectrum of <b>1</b> . ....                                                                    | 12 |
| <b>Figure S 7.</b> Selective 1D NOESY spectrum of <b>1</b> (irradiated at H-17). ....                                  | 13 |
| <b>Figure S 8.</b> Selective 1D NOESY spectrum of <b>1</b> (irradiated at H-27). ....                                  | 15 |
| <b>Figure S 9.</b> Selective 1D NOESY spectrum of <b>1</b> (irradiated at H-28). ....                                  | 16 |
| <b>Figure S 10.</b> Selective 1D NOESY spectrum of <b>1</b> (irradiated at H-25). ....                                 | 17 |
| <b>Figure S 11.</b> HRESIMS data of <b>1</b> . ....                                                                    | 18 |
| <b>Figure S 12.</b> $^1\text{H}$ NMR spectrum of <b>6</b> . ....                                                       | 19 |
| <b>Figure S 13.</b> $^{13}\text{C}$ NMR spectrum of <b>6</b> . ....                                                    | 20 |
| <b>Figure S 14.</b> HSQC spectrum of <b>6</b> . ....                                                                   | 21 |
| <b>Figure S 15.</b> $^1\text{H}$ - $^1\text{H}$ COSY spectrum of <b>6</b> . ....                                       | 22 |
| <b>Figure S 16.</b> HMBC spectrum of <b>6</b> . ....                                                                   | 23 |
| <b>Figure S 17.</b> NOESY spectrum of <b>6</b> . ....                                                                  | 24 |
| <b>Figure S 18.</b> HRESIMS data of <b>6</b> . ....                                                                    | 25 |
| <b>Figure S 19.</b> $^1\text{H}$ NMR spectrum of <b>7</b> . ....                                                       | 29 |
| <b>Figure S 20.</b> $^{13}\text{C}$ NMR spectrum of <b>7</b> . ....                                                    | 30 |
| <b>Figure S 21.</b> HSQC spectrum of <b>7</b> . ....                                                                   | 31 |
| <b>Figure S 22.</b> $^1\text{H}$ - $^1\text{H}$ COSY spectrum of <b>7</b> . ....                                       | 32 |
| <b>Figure S 23.</b> HMBC spectrum of <b>7</b> . ....                                                                   | 33 |
| <b>Figure S 24.</b> Band selective HMBC of <b>7</b> . ....                                                             | 34 |
| <b>Figure S 25.</b> Selective 1D NOESY spectrum of <b>7</b> (irradiated at H-3). ....                                  | 35 |
| <b>Figure S 26.</b> Selective 1D NOESY spectrum of <b>7</b> (irradiated at H-11). ....                                 | 36 |
| <b>Figure S 27.</b> Selective 1D NOESY spectrum of <b>7</b> (irradiated at H-13). ....                                 | 37 |
| <b>Figure S 28.</b> Selective 1D NOESY spectrum of <b>7</b> (irradiated at H-14). ....                                 | 38 |
| <b>Figure S 29.</b> HRESIMS data of <b>7</b> . ....                                                                    | 39 |
| <b>Figure S 30.</b> Comparison of ECD spectra of <b>7</b> and saliniketal A ( <b>8</b> ). ....                         | 40 |
| <b>Figure S 31.</b> Results of cytotoxicity test and dose-response curves for compounds <b>1</b> and <b>6-8</b> . .... | 45 |

|                                                                                |    |
|--------------------------------------------------------------------------------|----|
| <b>Table S 1.</b> Comparison of chemical shifts of <b>1</b> and <b>2</b> ..... | 5  |
| <b>Table S 2.</b> Comparison of chemical shifts of <b>7</b> and <b>8</b> ..... | 26 |

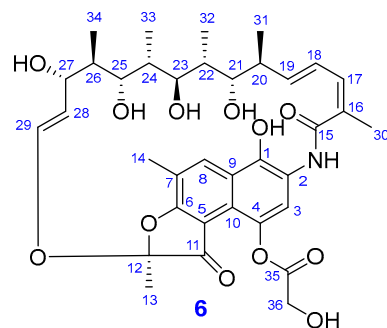

<https://doi.org/10.7164/antibiotics.22.369>

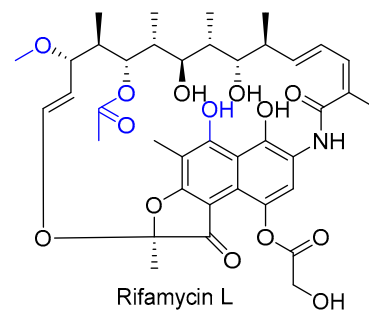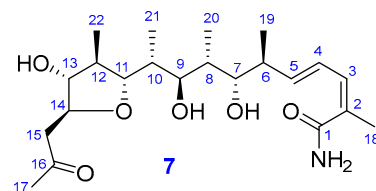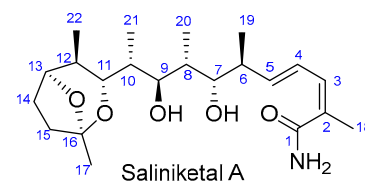

<https://doi.org/10.1021/np0604580>

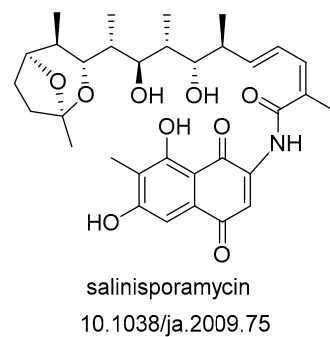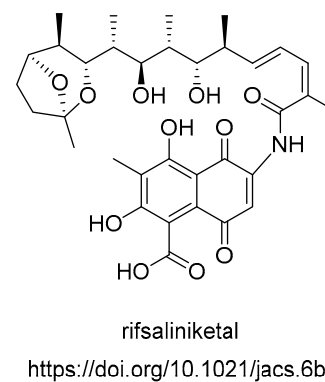

**Figure S1.** Structures of some analogs of the isolated compounds.



**Table S1.** Comparison of chemical shifts of **1** and **2**.

|    | <b>1</b>            |                     | <b>2</b>            |                     |
|----|---------------------|---------------------|---------------------|---------------------|
|    | $\delta_{\text{H}}$ | $\delta_{\text{C}}$ | $\delta_{\text{H}}$ | $\delta_{\text{C}}$ |
| 1  |                     | 183.8               |                     | 184.1               |
| 2  |                     | 142.4               |                     | 142.4               |
| 3  | 7.63, s             | 117.1               | 7.61, s             | 117.2               |
| 4  |                     | 186.5               |                     | 186.5               |
| 5  | 7.05, s             | 108.7               | 7.02, s             | 108.8               |
| 6  |                     | 163.8               |                     | 164.0               |
| 7  |                     | 118.1               |                     | 118.3               |
| 8  |                     | 165.1               |                     | 165.2               |
| 9  |                     | 108.2               |                     | 131.1               |
| 10 |                     | 132.2               |                     | 132.4               |
| 11 |                     | 171.4               |                     | 172.3               |
| 12 |                     | 134.8               |                     | 131.1               |
| 13 | 1.91, d, $J=1.3$    | 13.5                | 1.88, s             | 13.3                |

|    |                            |       |                            |       |
|----|----------------------------|-------|----------------------------|-------|
| 14 | 2.11, s                    | 8.0   | 2.09, s                    | 8.2   |
| 15 |                            | 169.9 |                            | 170.0 |
| 16 |                            | 129.4 |                            | 129.4 |
| 17 | 6.48, d, $J = 11.1$        | 138.7 | 6.50, d, $J = 10.8$        | 139.1 |
| 18 | 6.82, dd, $J = 15.0, 11.2$ | 127.7 | 6.86, dd, $J = 14.9, 12.4$ | 127.8 |
| 19 | 6.03, dd, $J = 15.1, 8.0$  | 145.7 | 6.07, m                    | 146.4 |
| 20 | 2.44. m                    | 42.2  | 2.47, m                    | 42.5  |
| 21 | 3.76, d, $J = 9.8$         | 75.9  | 3.83, m                    | 75.8  |
| 22 | 1.94, m                    | 35.0  | 1.96, m                    | 36.5  |
| 23 | 3.65, dd, $J = 10.1, 2.6$  | 77.7  | 3.62, m                    | 78.5  |
| 24 | 2.07. m                    | 38.7  | 2.02, m                    | 37.0  |
| 25 | 4.60, d, $J = 11.0$        | 83.1  | 4.21, m                    | 72.7  |
| 26 | 1.93, m                    | 39.1  | 1.61, m                    | 41.3  |
| 27 | 3.55, t, $J = 9.6$         | 74.5  | 3.56, m                    | 73.4  |
| 28 | 3.45, t, $J = 9.6$         | 51.6  | 2.61, m                    | 50.7  |
| 29 | 6.68, dd, $J = 9.6, 1.2$   | 137.1 | 6.78, d, $J = 10.1$        | 142.4 |
| 30 | 2.09, s                    | 20.5  | 2.08, s                    | 20.7  |

|                                                                                                                                               |                  |       |                  |      |
|-----------------------------------------------------------------------------------------------------------------------------------------------|------------------|-------|------------------|------|
| 31                                                                                                                                            | 1.01, d, $J=6.8$ | 16.9  | 1.02, s          | 17.2 |
| 32                                                                                                                                            | 1.10, d, $J=7.0$ | 11.6  | 1.00, s          | 11.2 |
| 33                                                                                                                                            | 0.89, d, $J=6.9$ | 9.3   | 0.98, s          | 10.9 |
| 34                                                                                                                                            | 1.08, d, $J=6.5$ | 13.1  | 0.96, s          | 12.8 |
| 34a                                                                                                                                           |                  | 173.0 | 5.08, d, $J=3.3$ | 94.5 |
| <i>Biomolecules</i> <b>2021</b> , <i>11</i> (7), 920; <a href="https://doi.org/10.3390/biom11070920">https://doi.org/10.3390/biom11070920</a> |                  |       |                  |      |

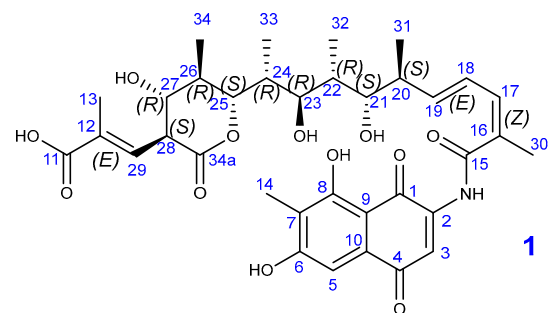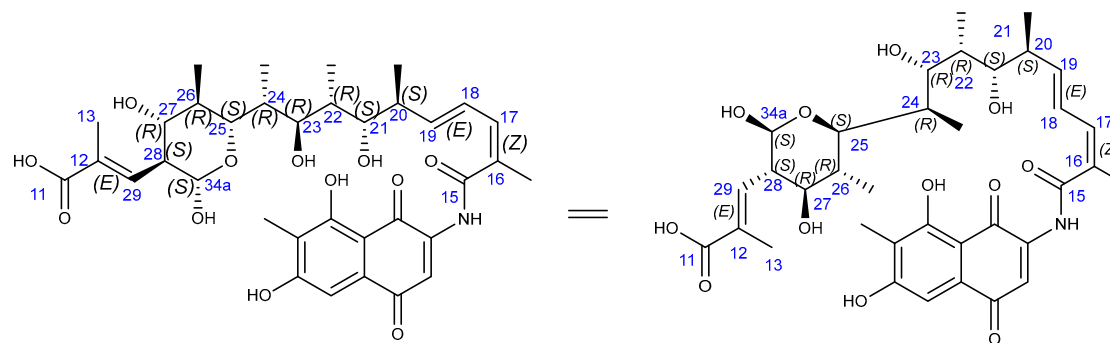

2 drawn in different ways

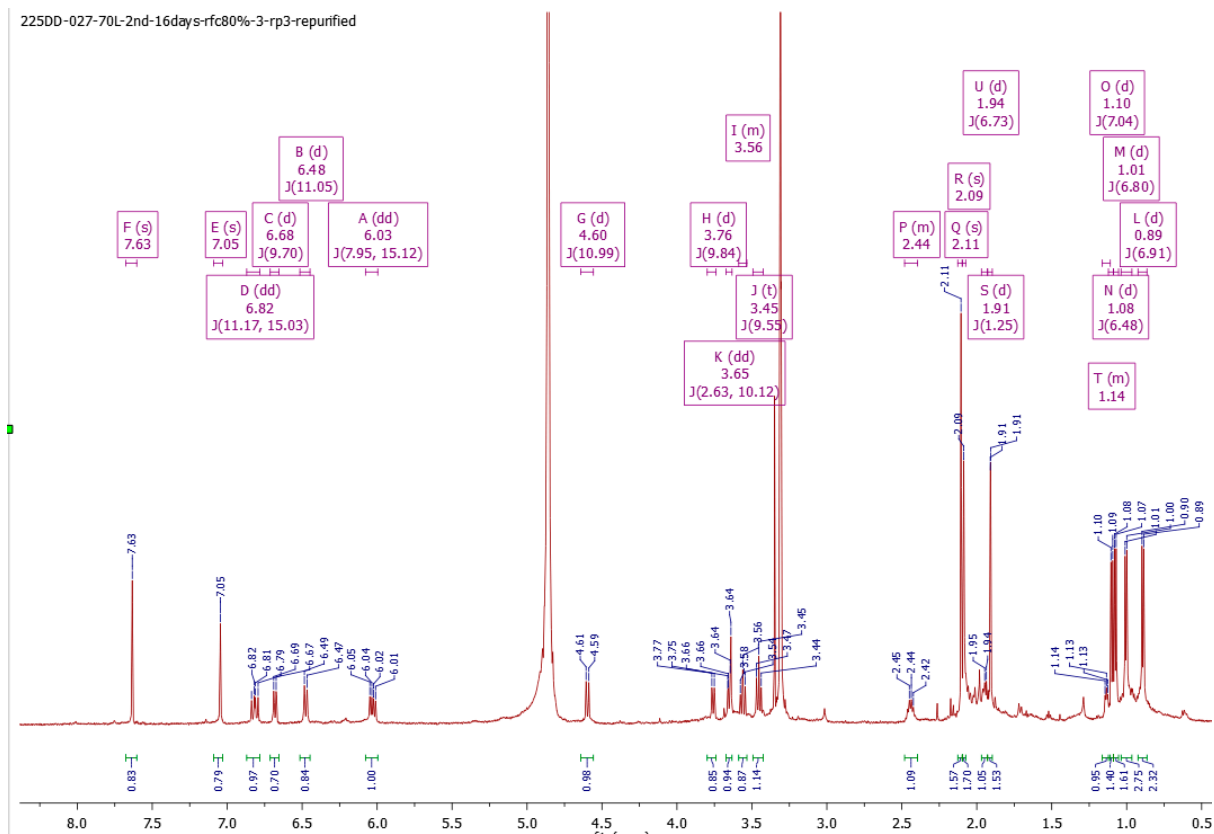

Figure S2.  $^1\text{H}$  NMR spectrum of **1**.

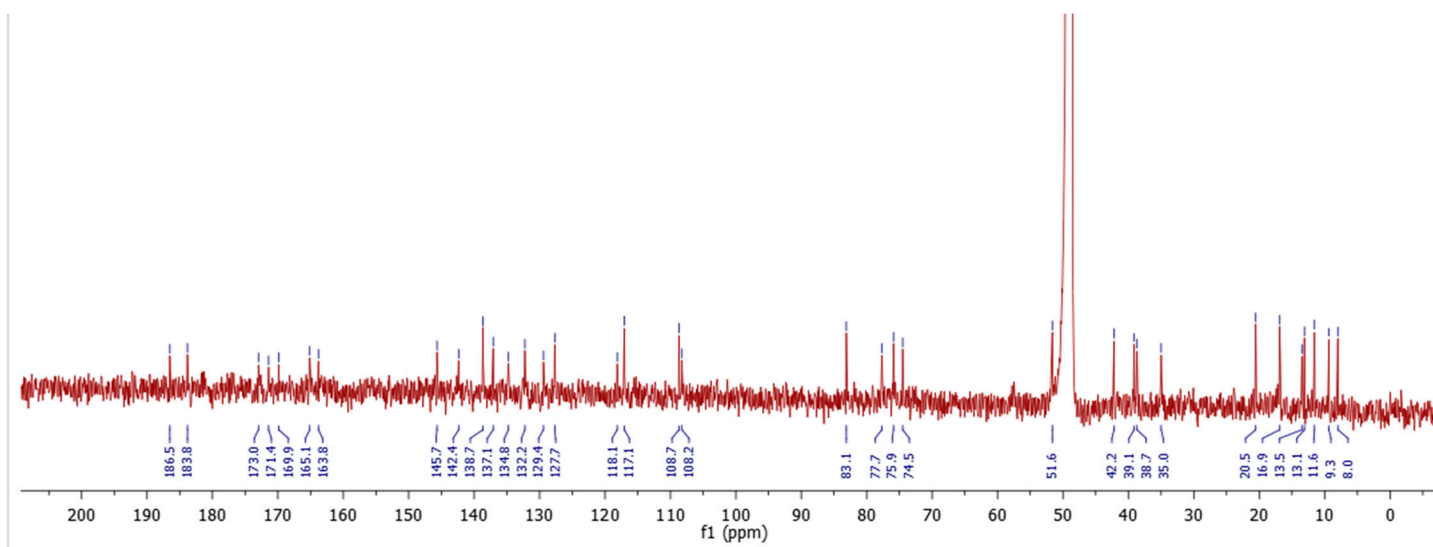

**Figure S3.**  $^{13}\text{C}$  NMR spectrum of **1**.

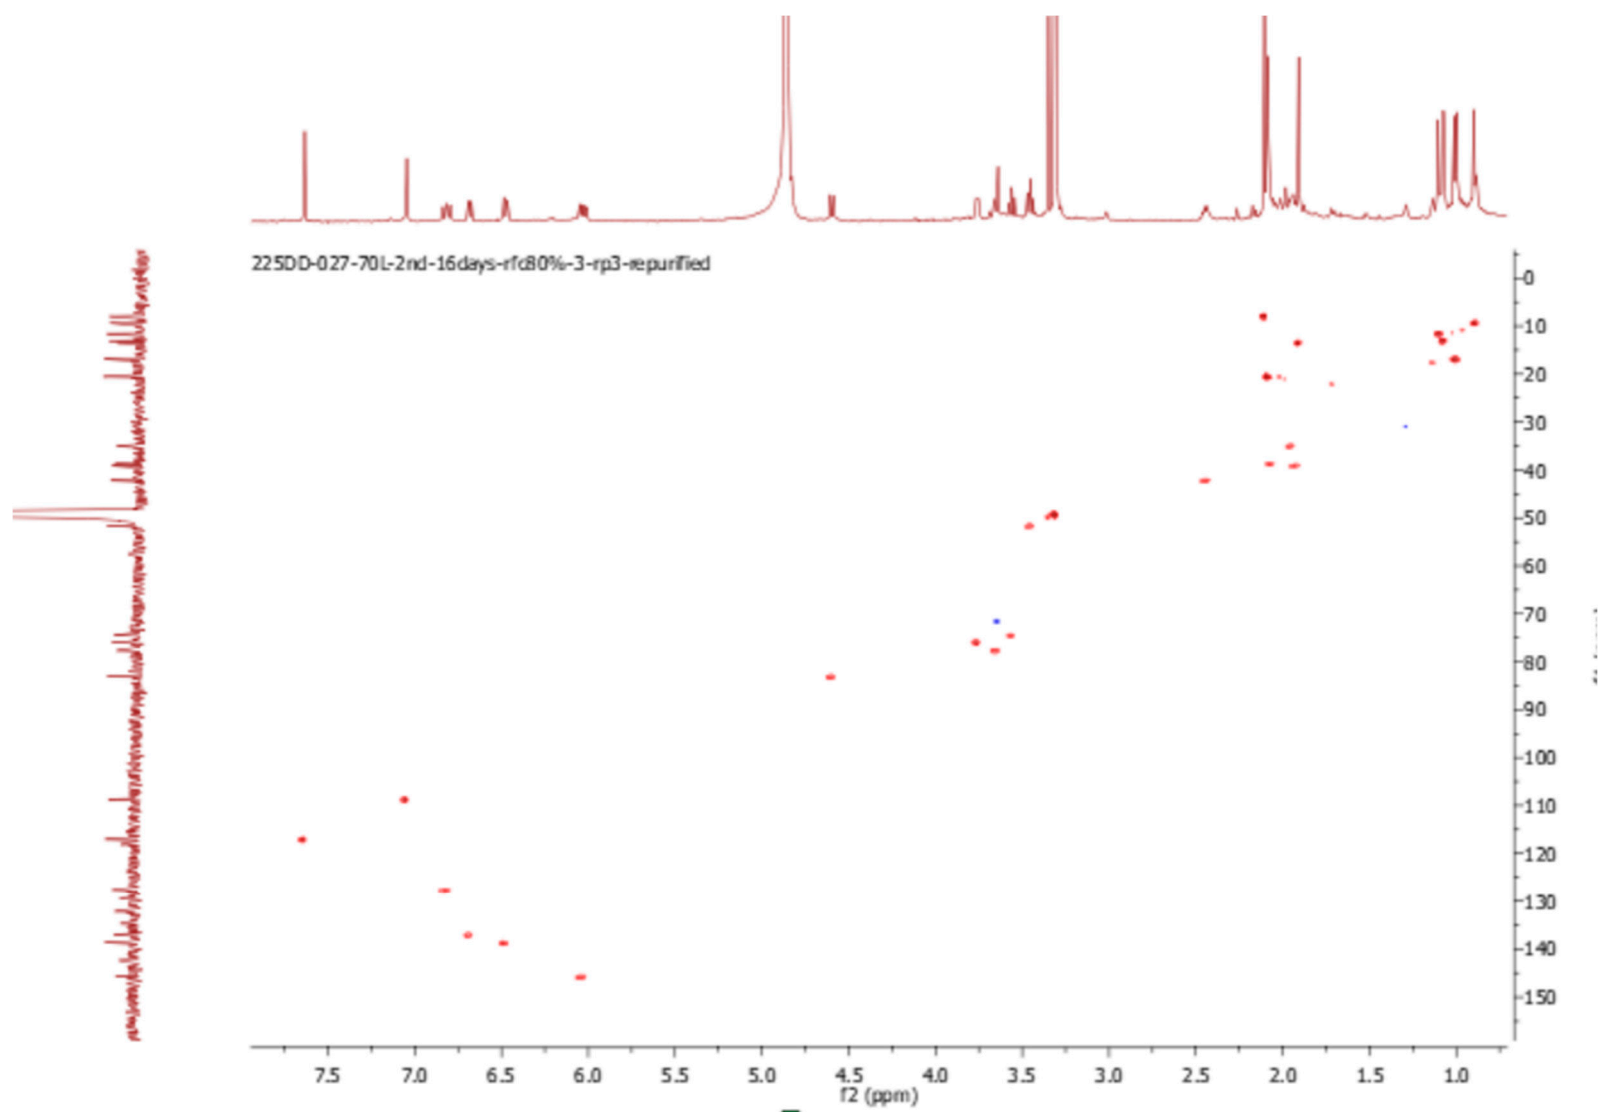

**Figure S4.** HSQC spectrum of **1**.

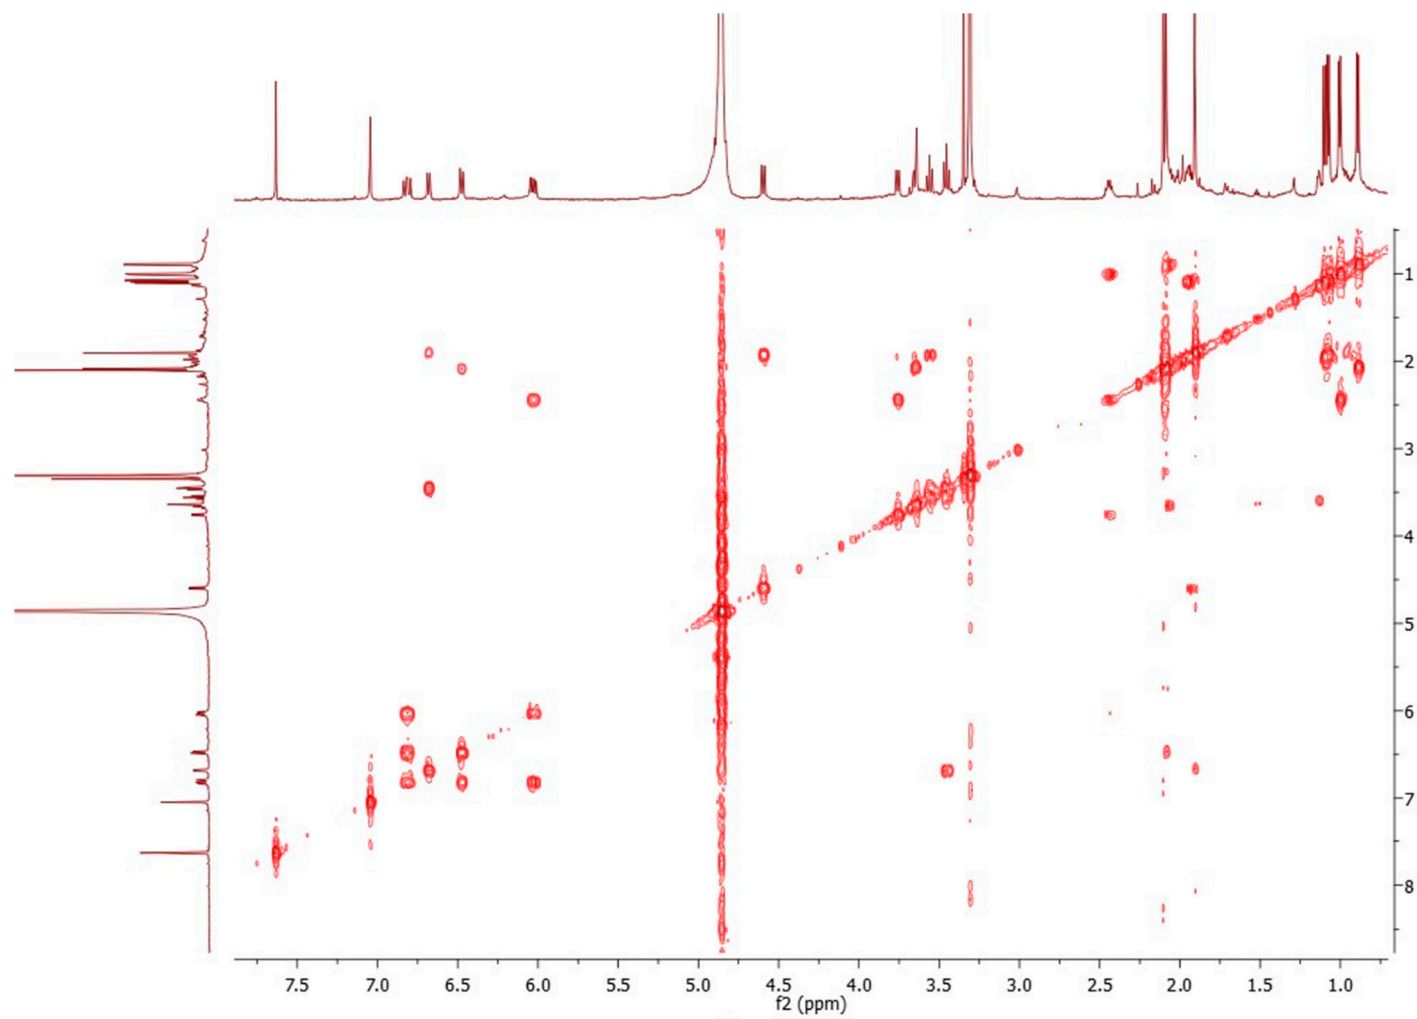

**Figure S5.**  $^1\text{H}$ - $^1\text{H}$  COSY spectrum of **1**.

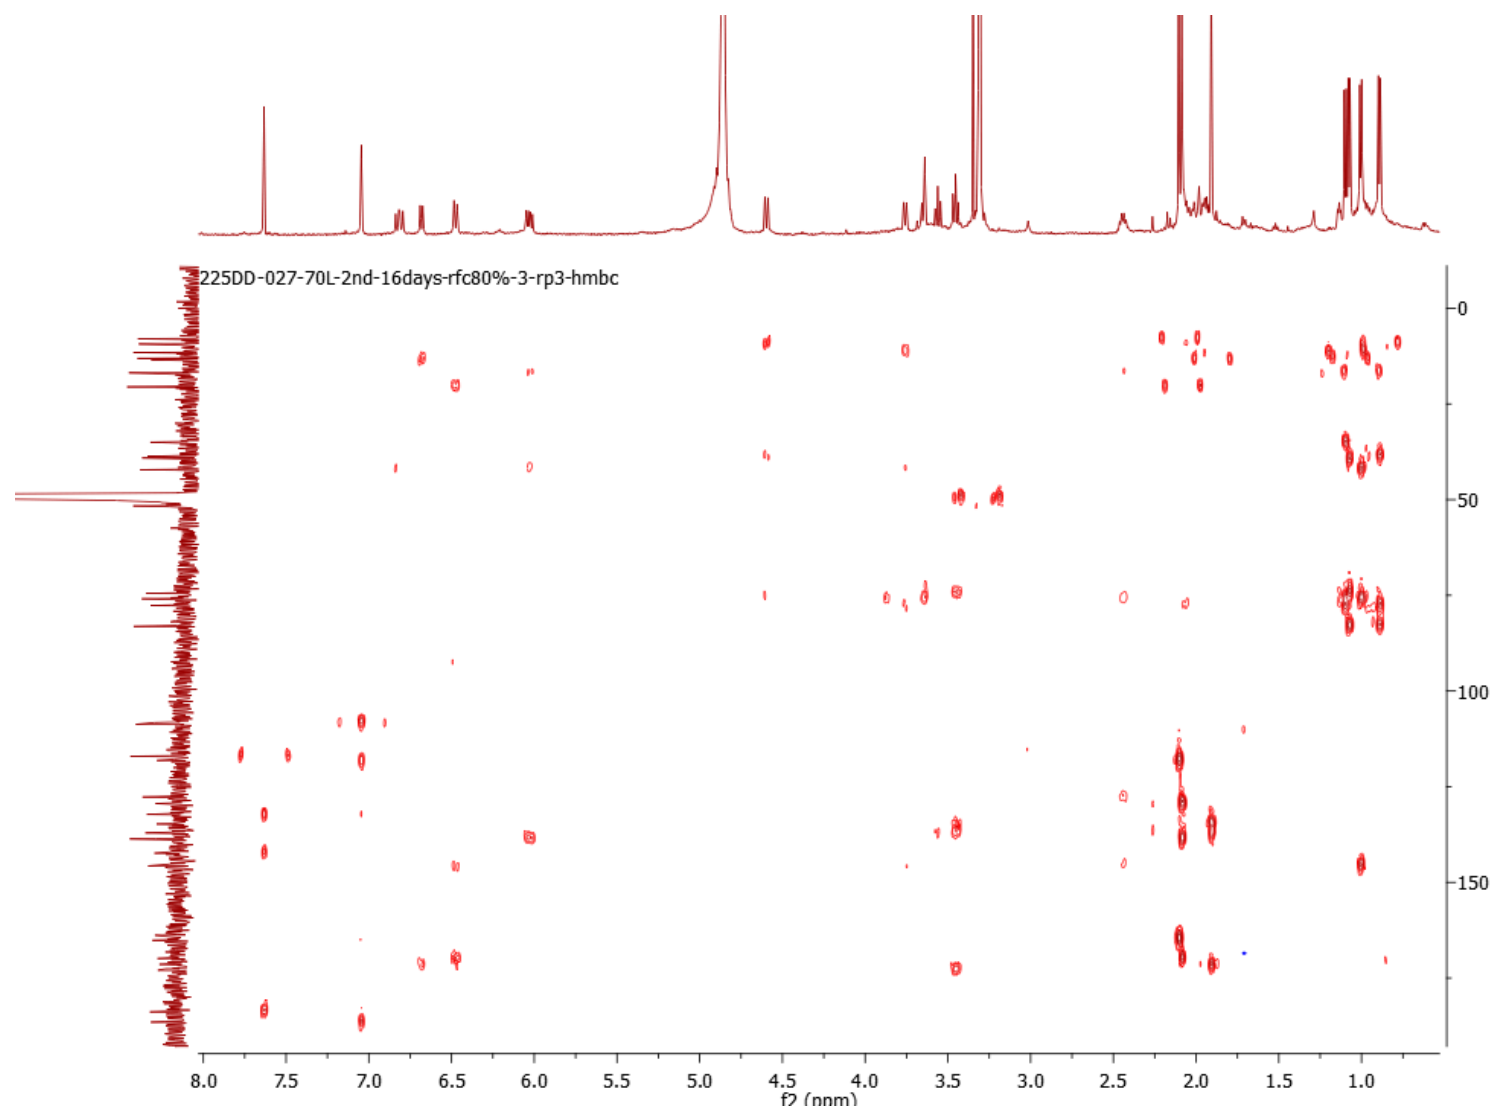

**Figure S6.** HMBC spectrum of **1**.



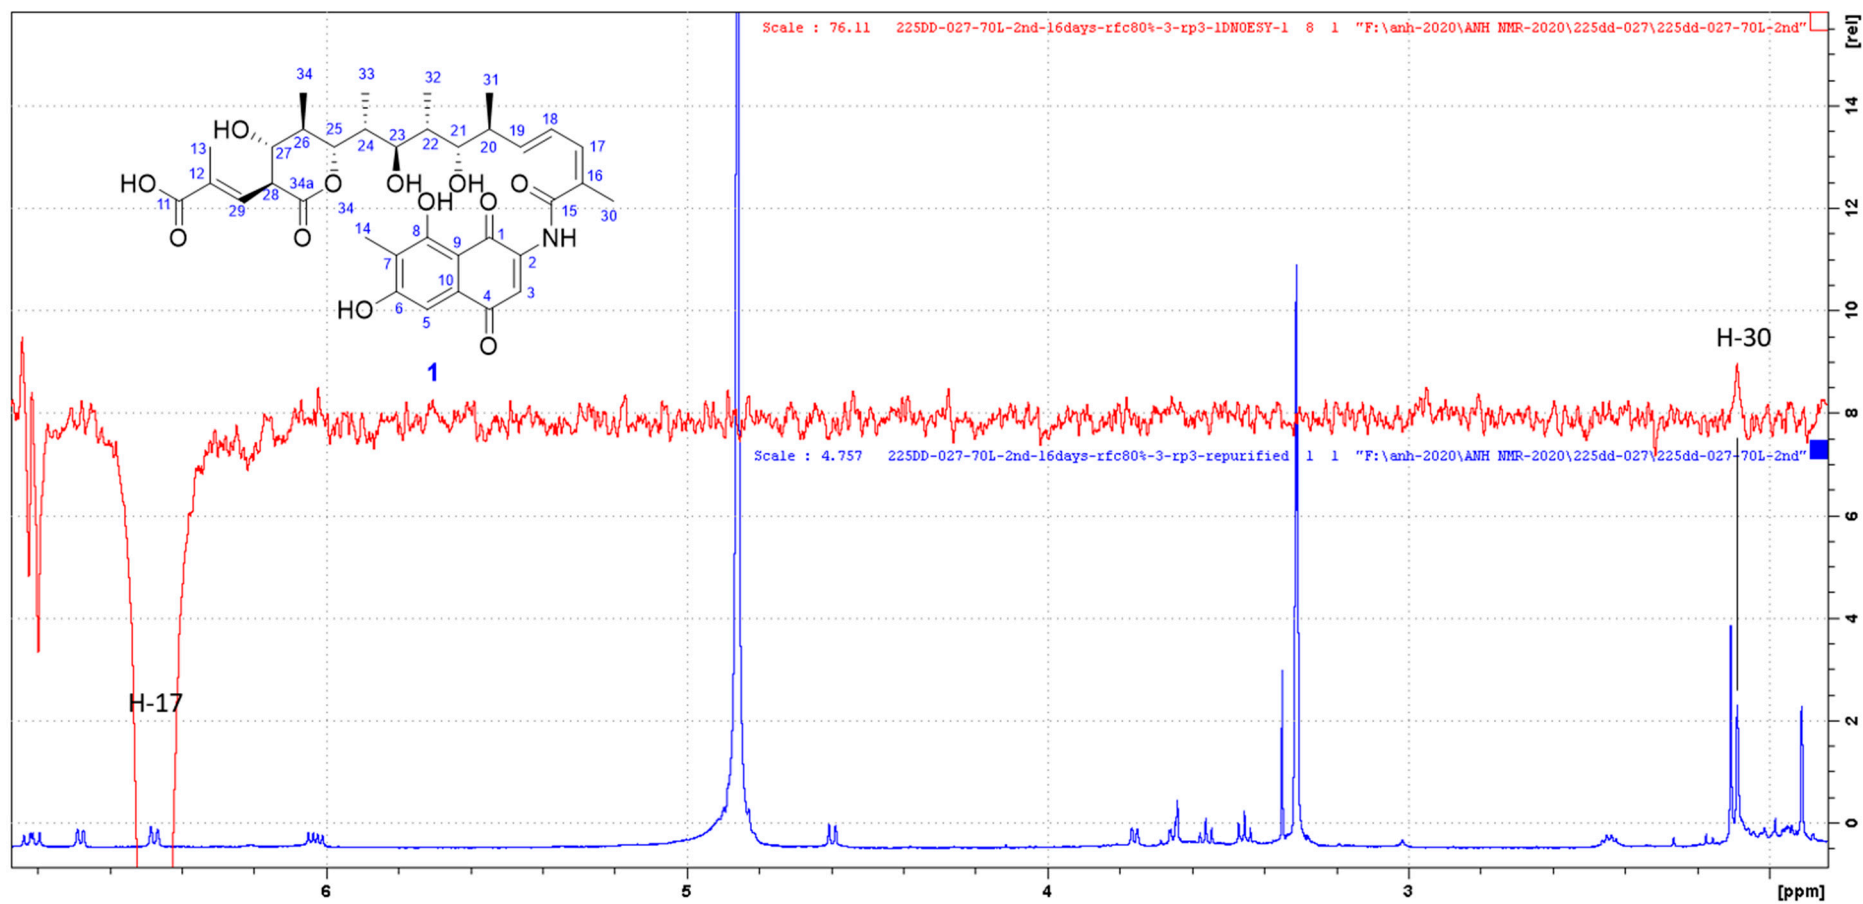

Figure S7. Selective 1D NOESY spectrum of **1** (irradiated at H-17).

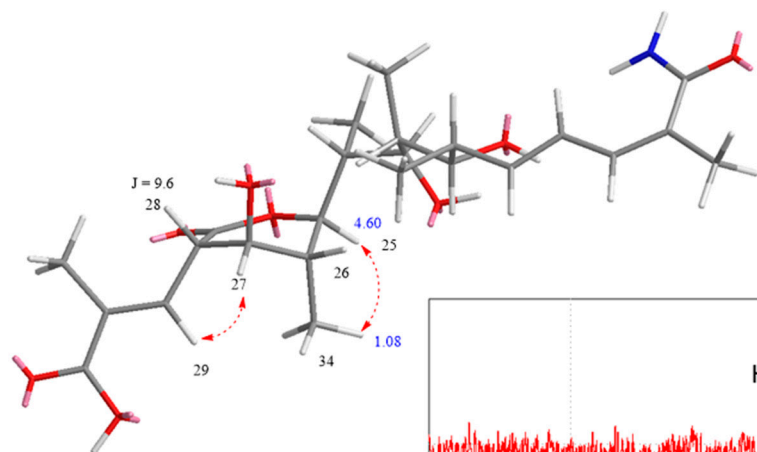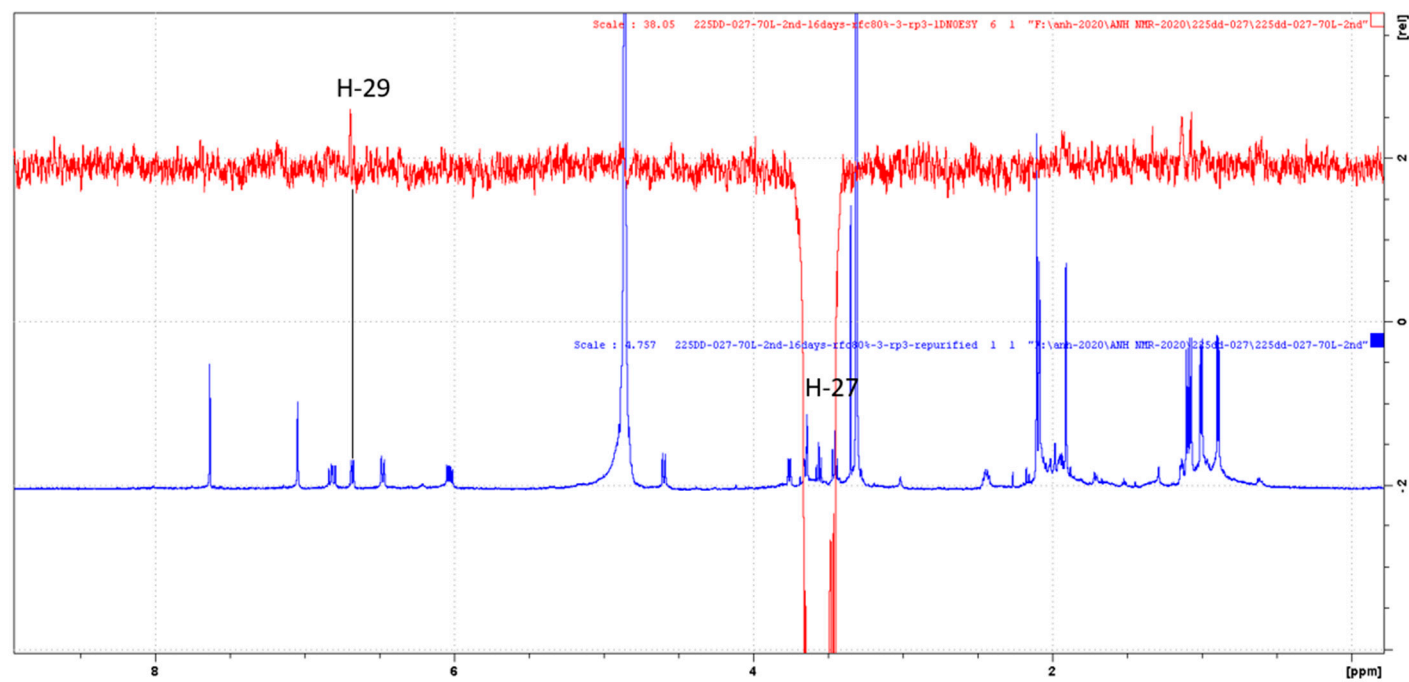

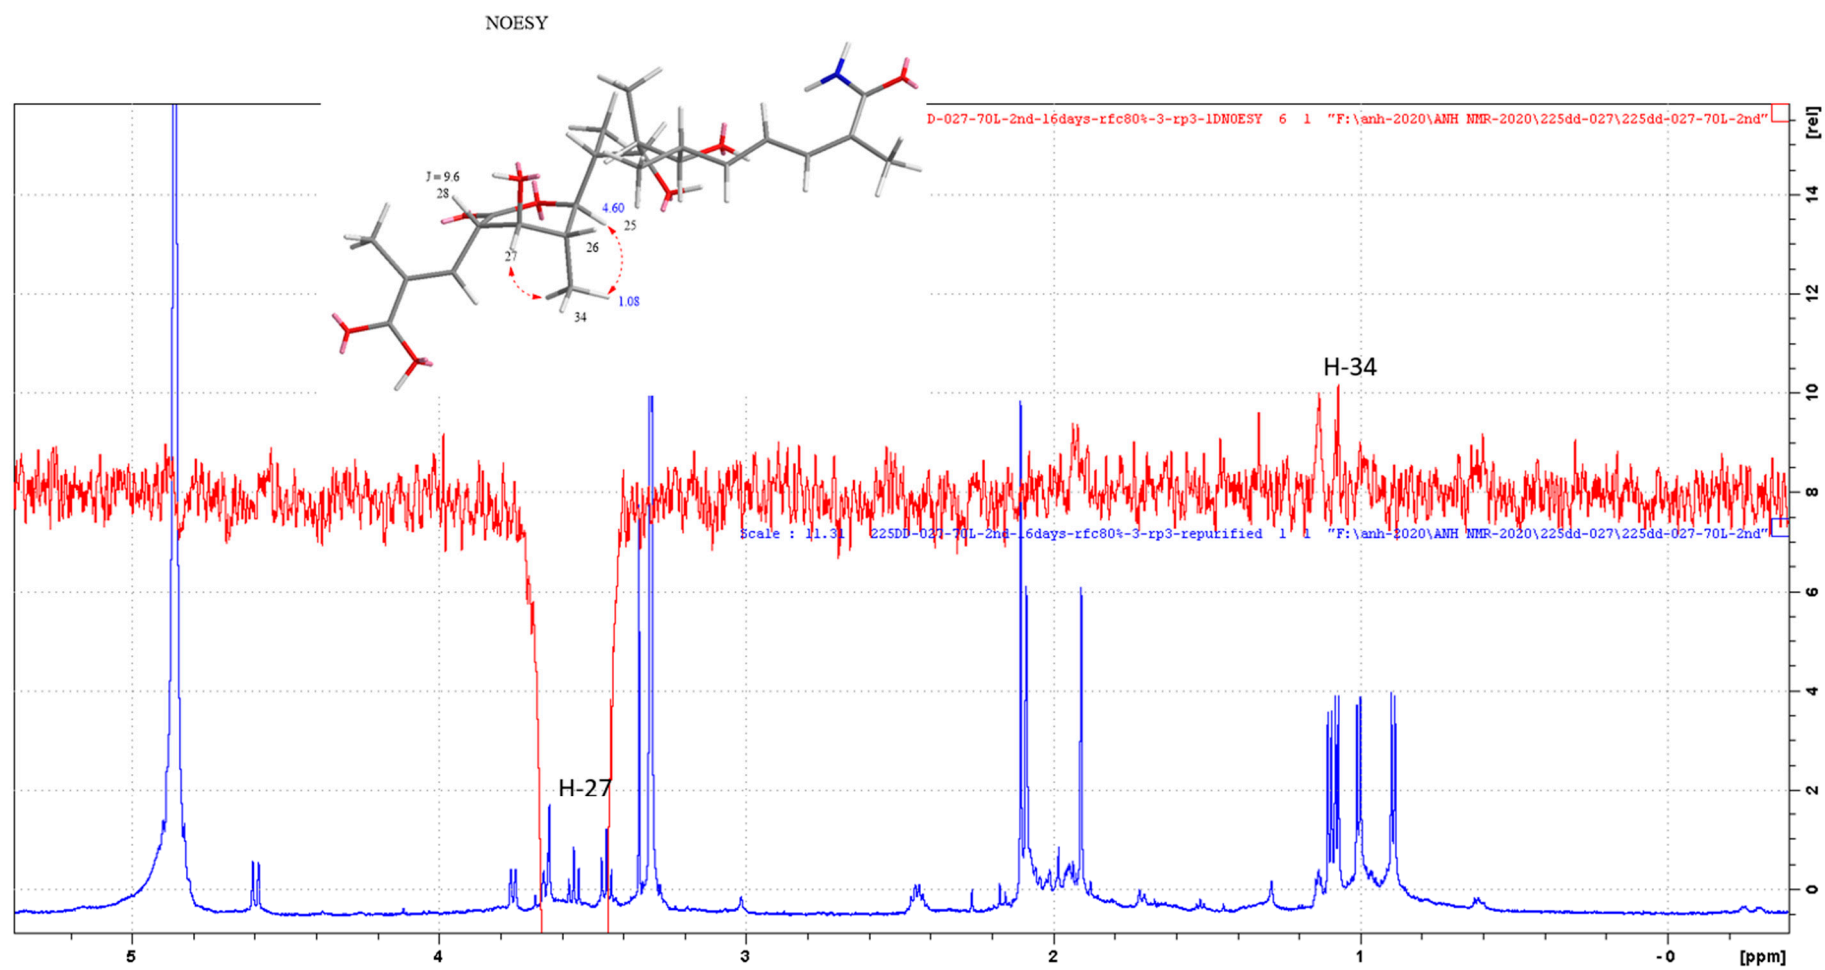

**Figure S8.** Selective 1D NOESY spectrum of **1** (irradiated at H-27).

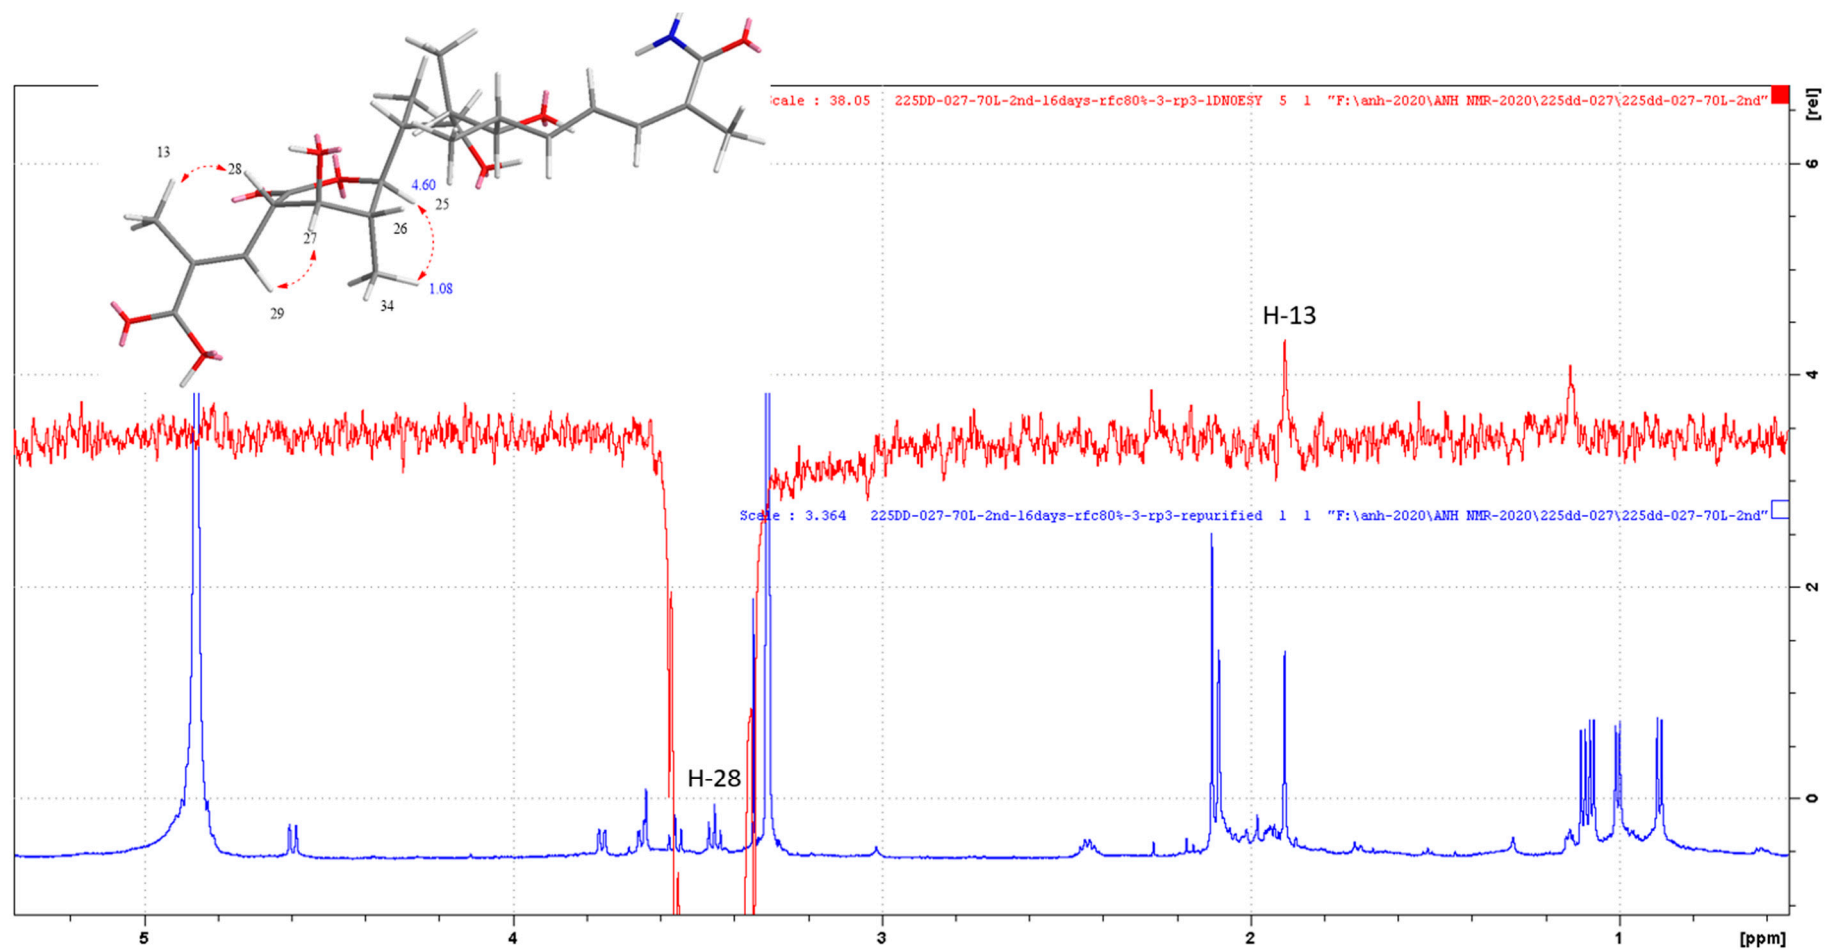

**Figure S9.** Selective 1D NOESY spectrum of **1** (irradiated at H-28).

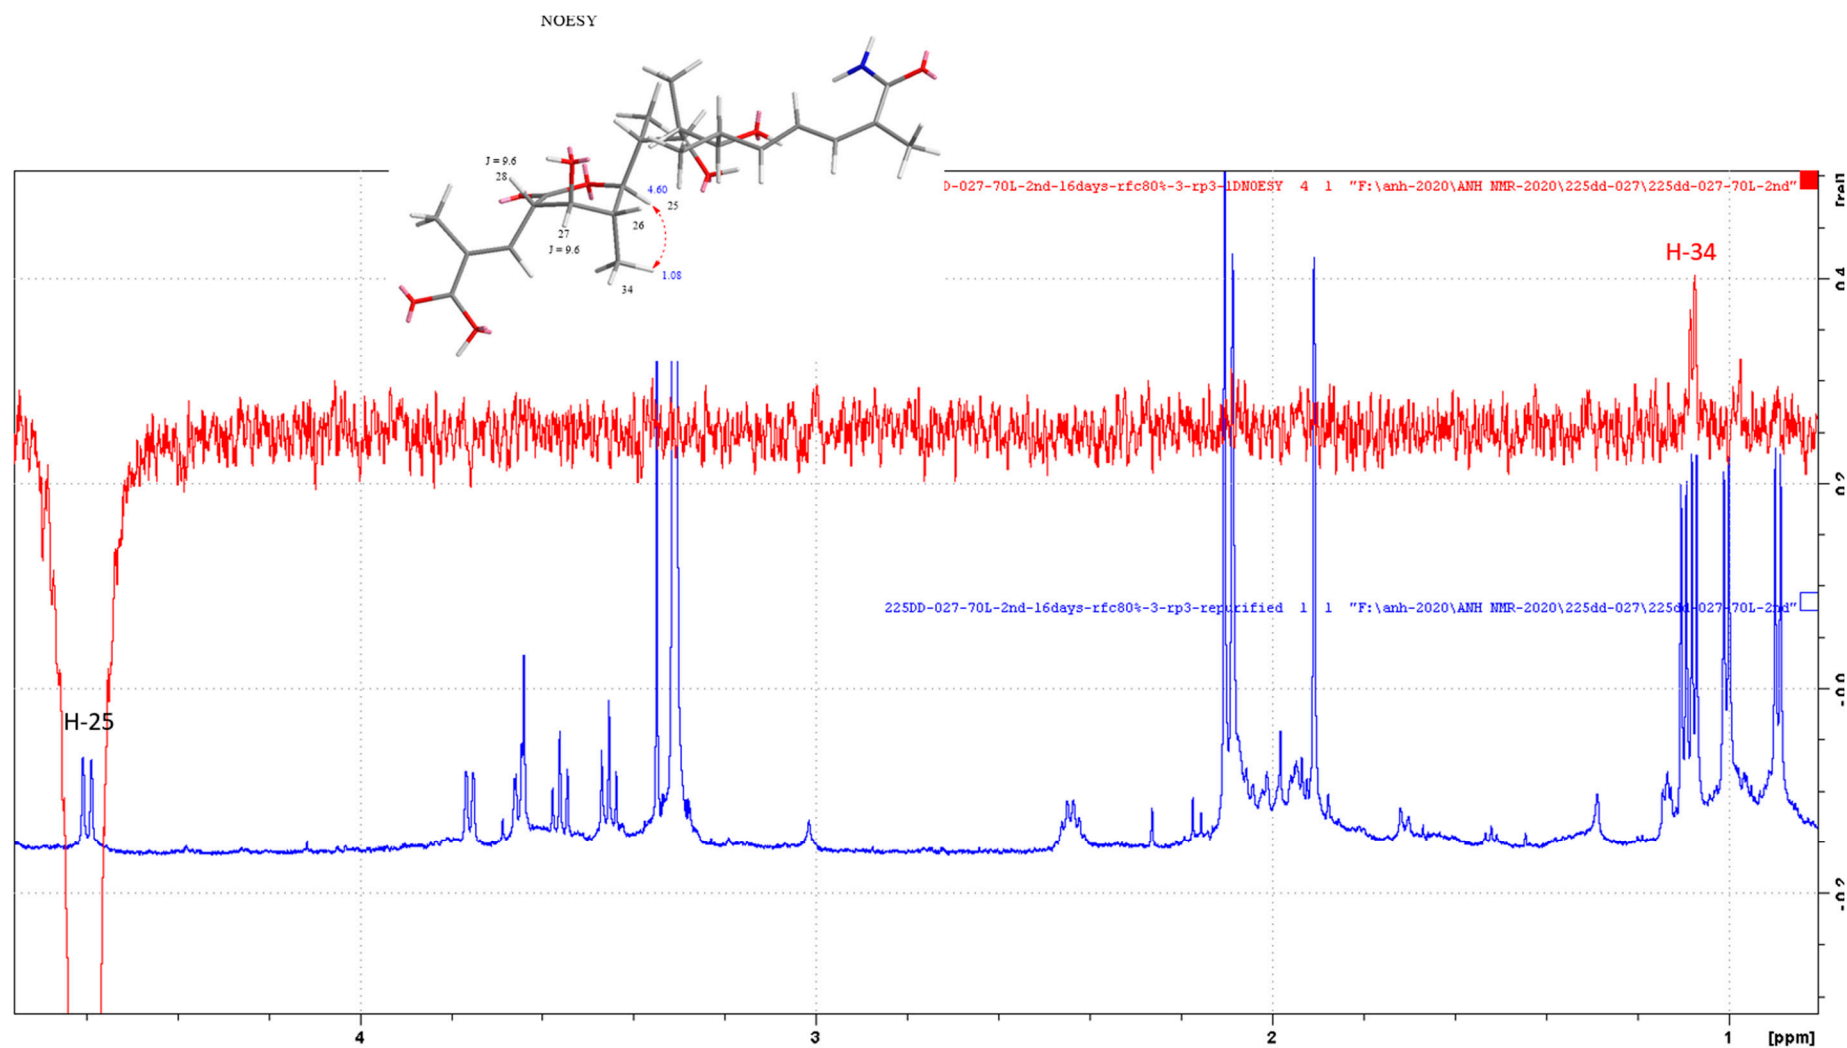

**Figure S10.** Selective 1D NOESY spectrum of **1** (irradiated at H-25).

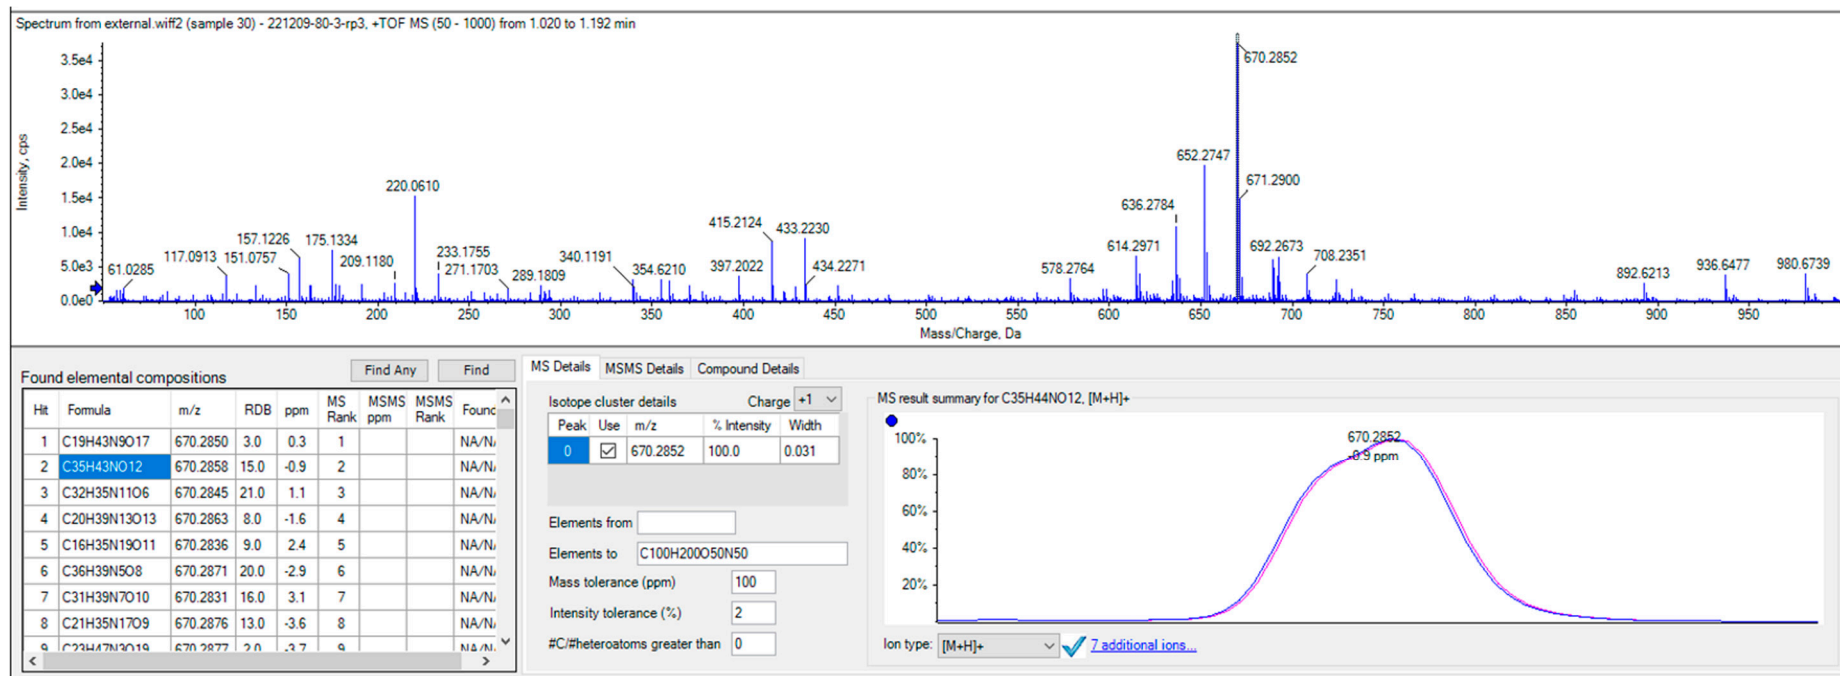

Figure S11. HRESIMS data of 1.

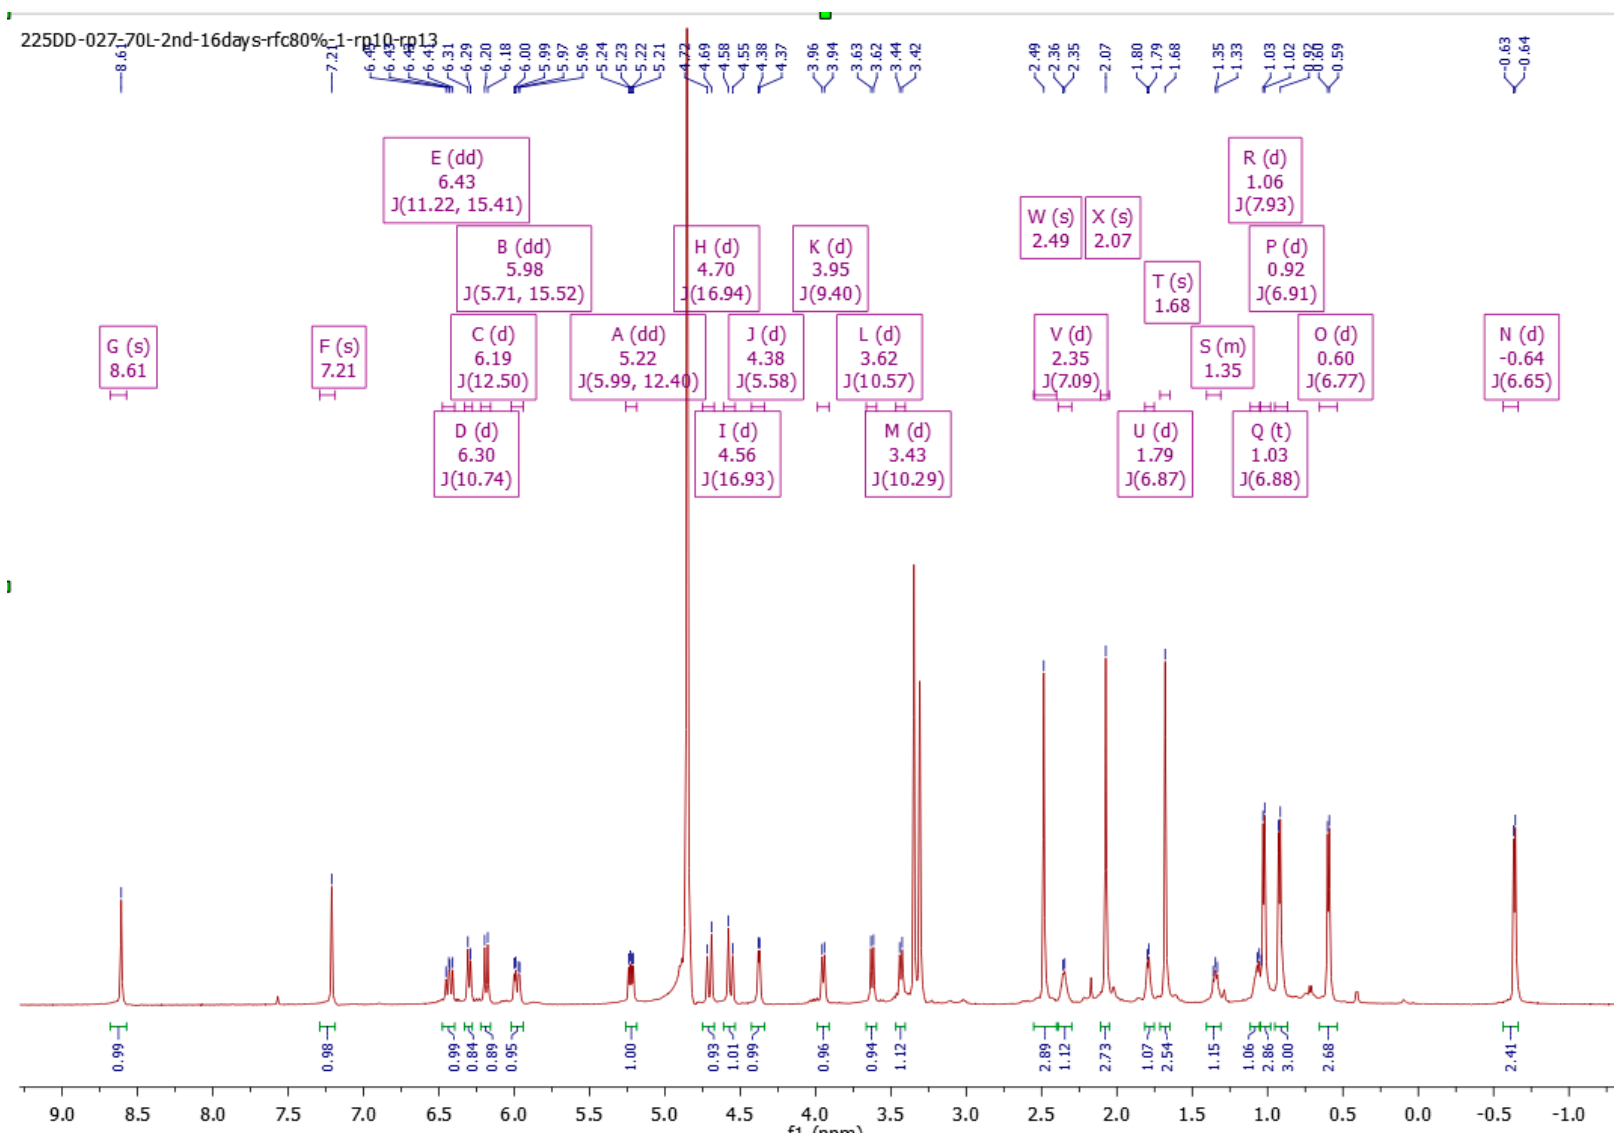

Figure S12.  $^1\text{H}$  NMR spectrum of **6**.

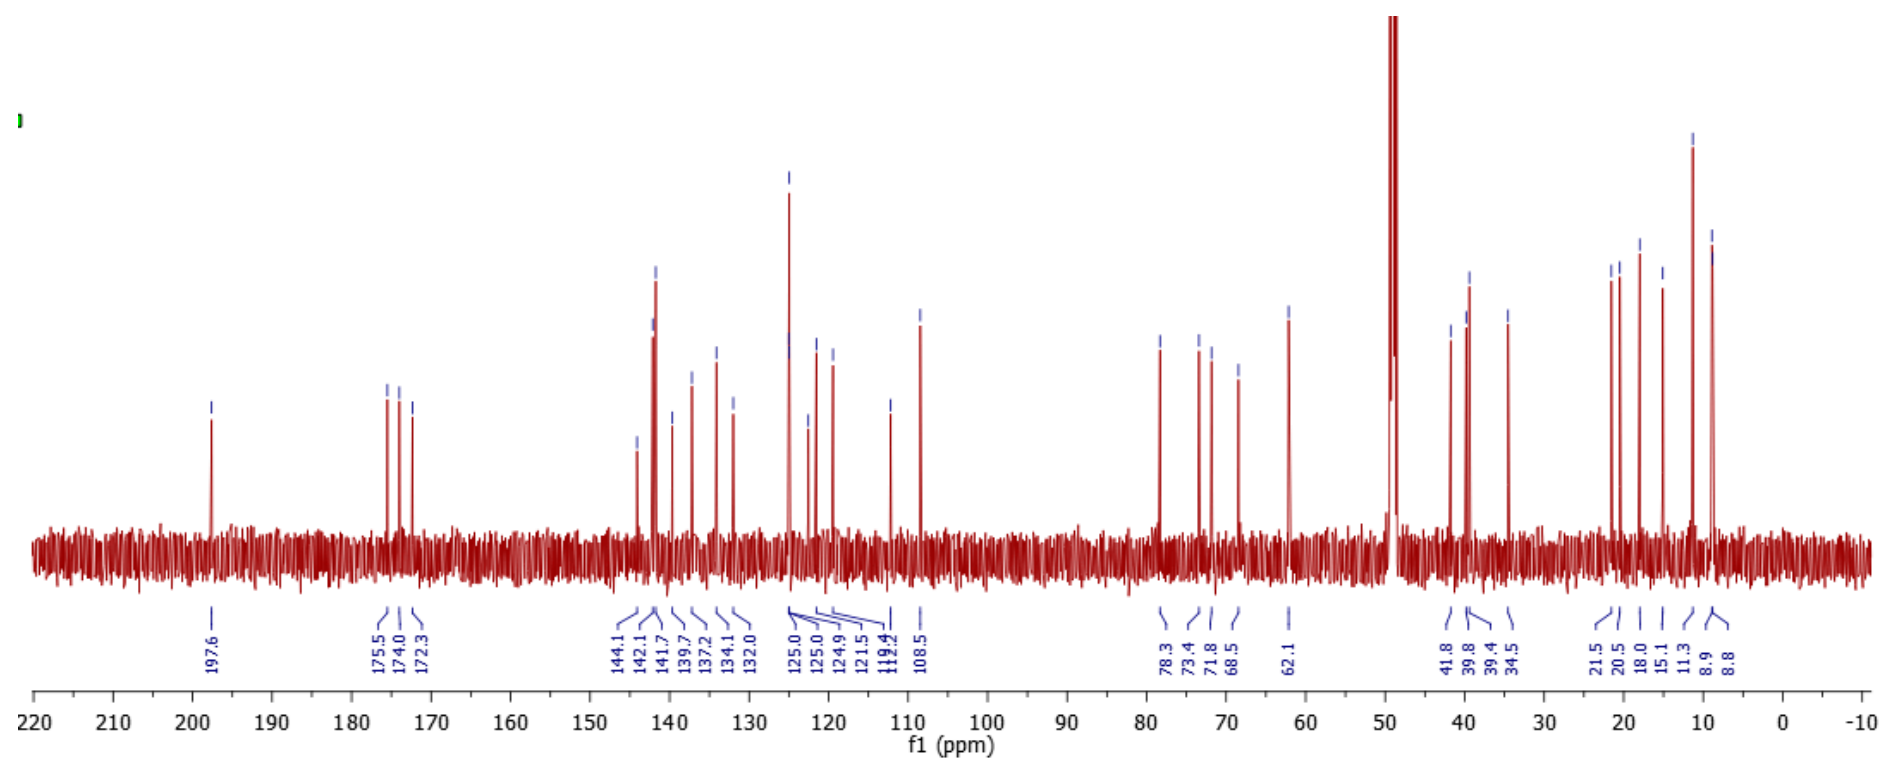

**Figure S13.** <sup>13</sup>C NMR spectrum of **6**.



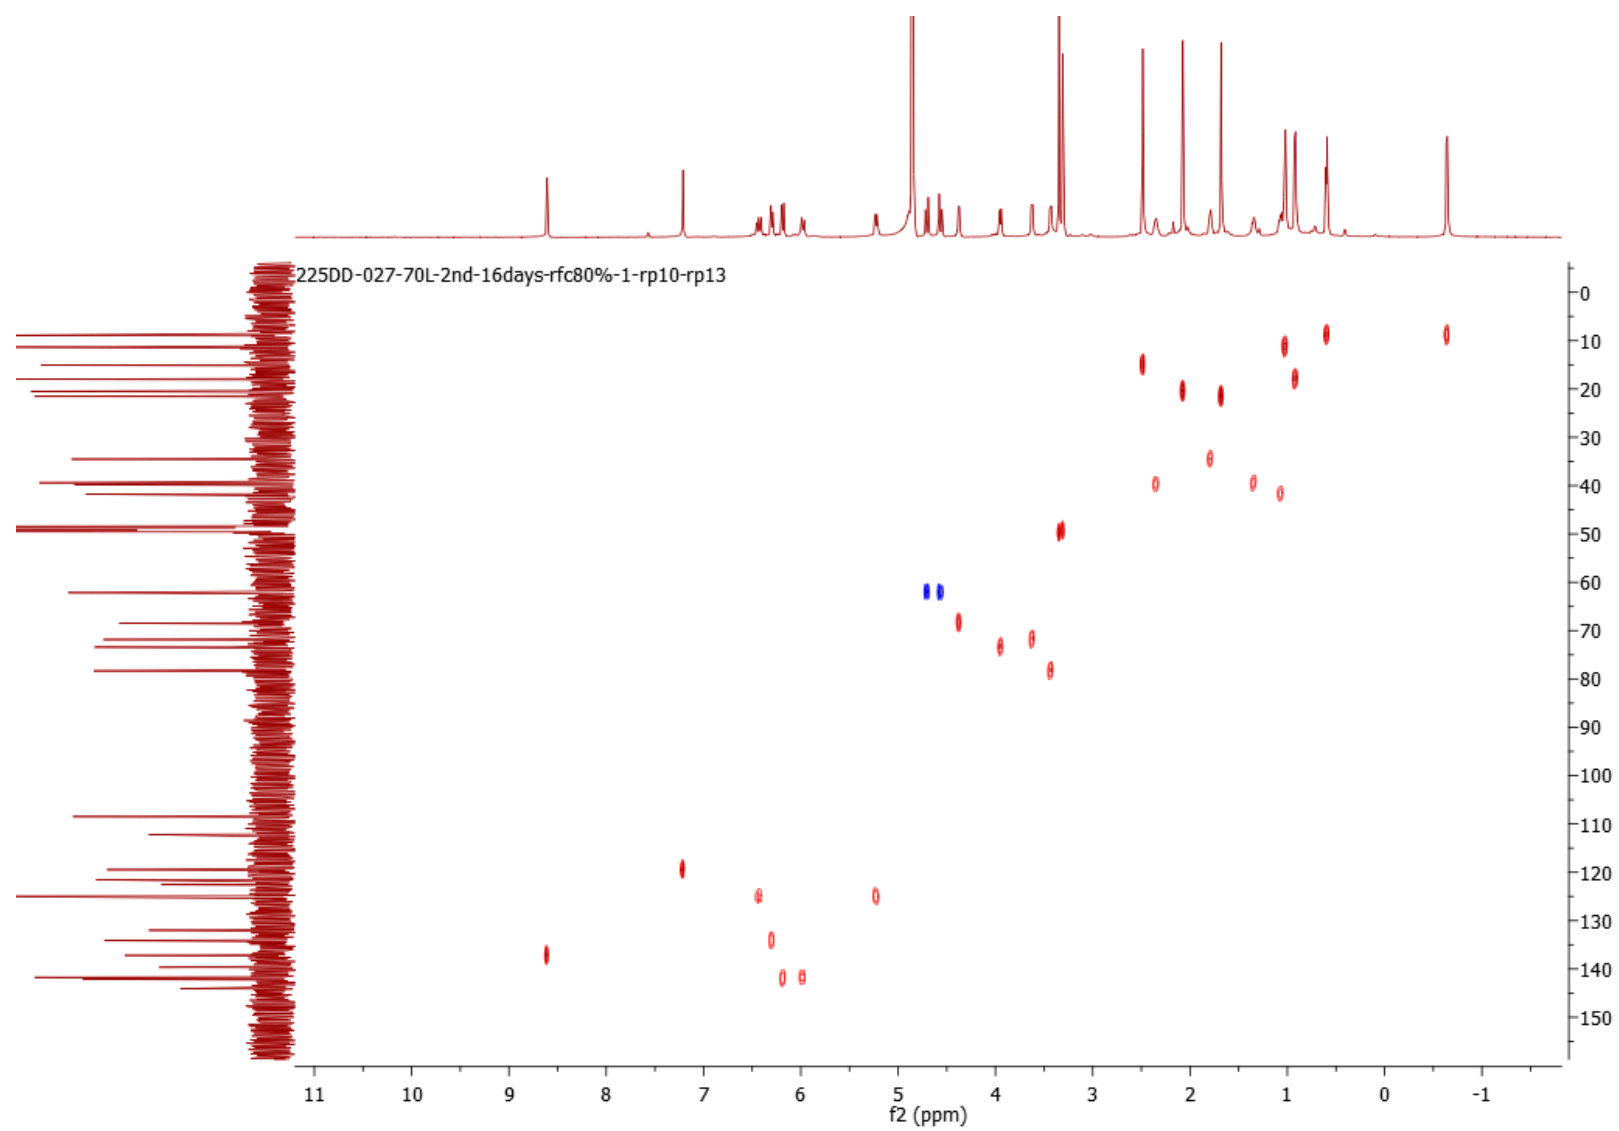

**Figure S14.** HSQC spectrum of **6**.



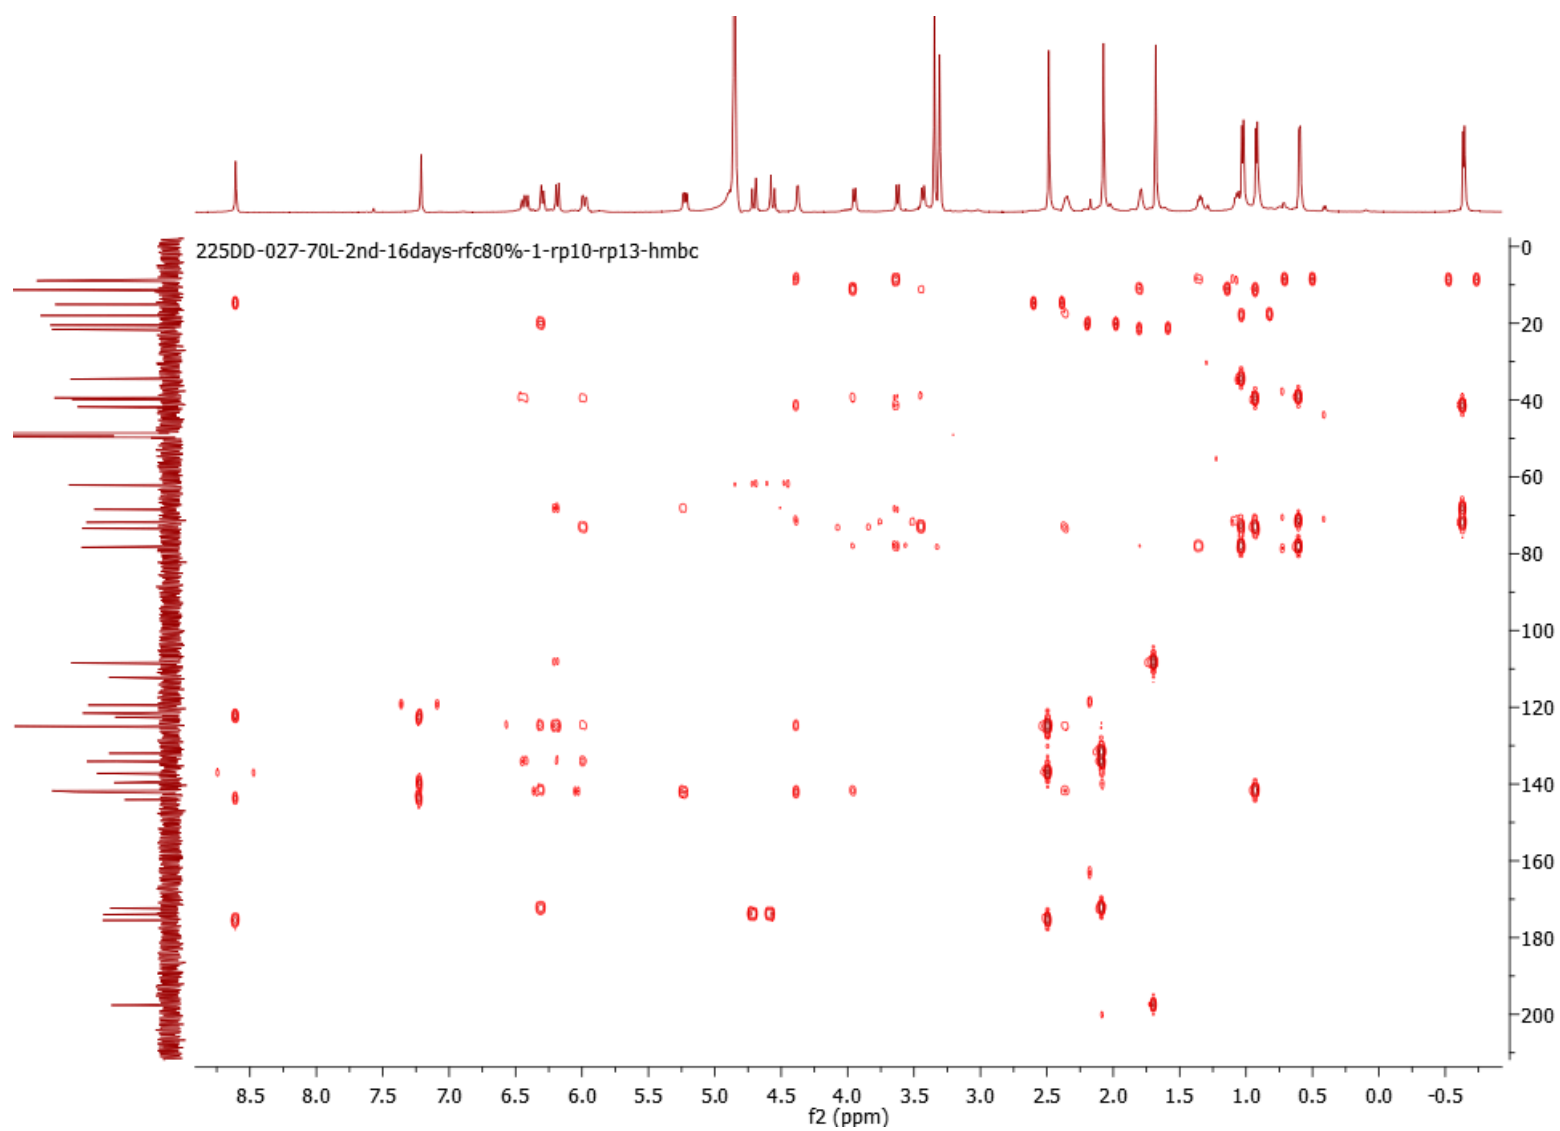

**Figure S16.** HMBC spectrum of **6**.

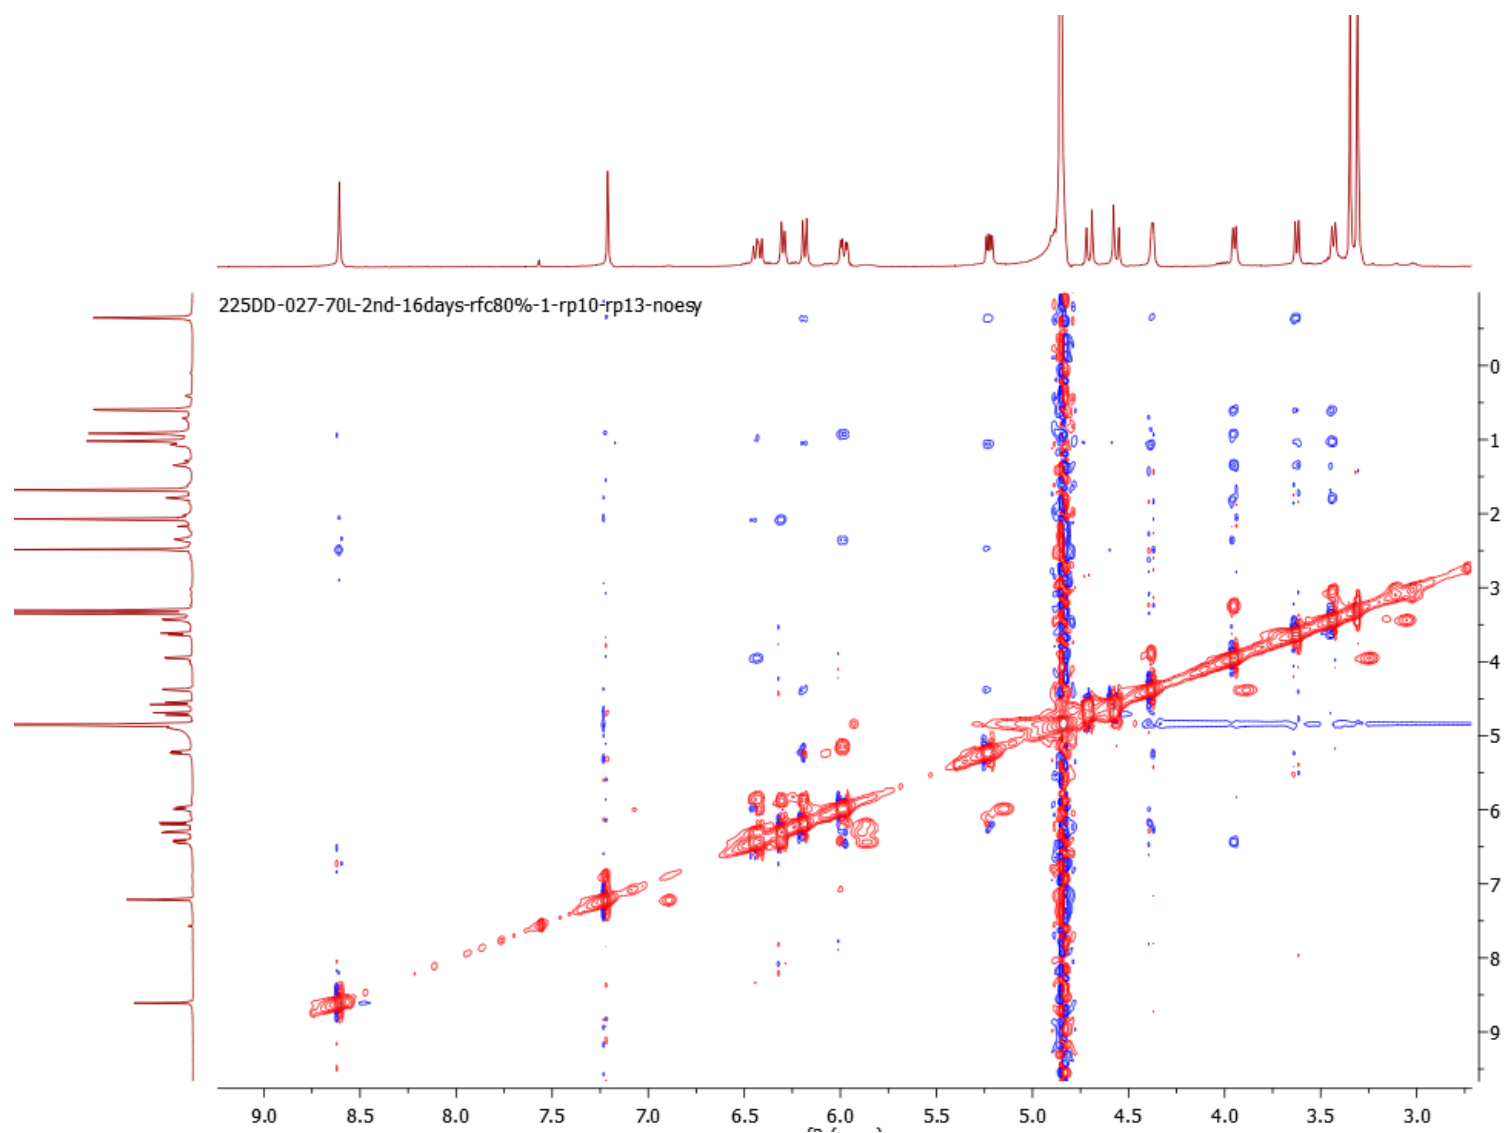

**Figure S17.** NOESY spectrum of **6**.

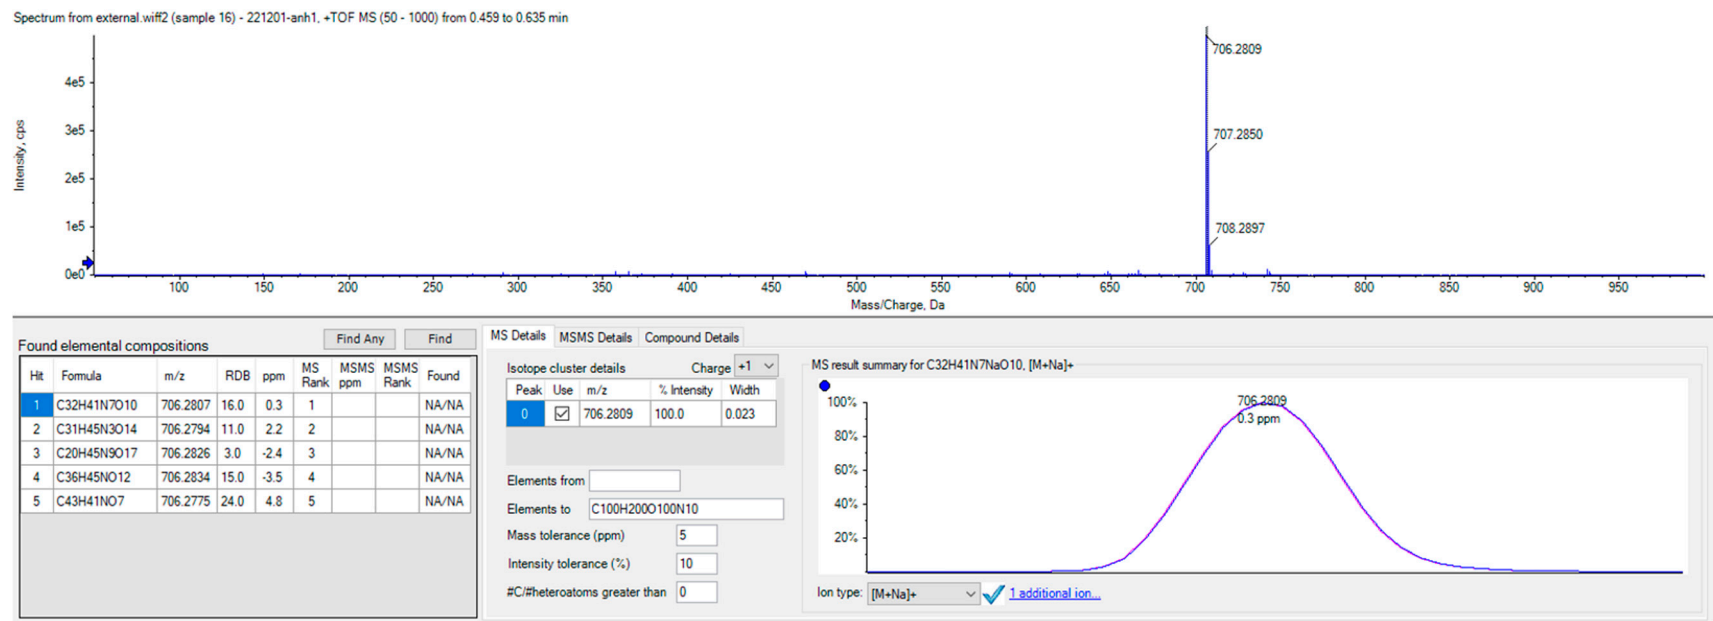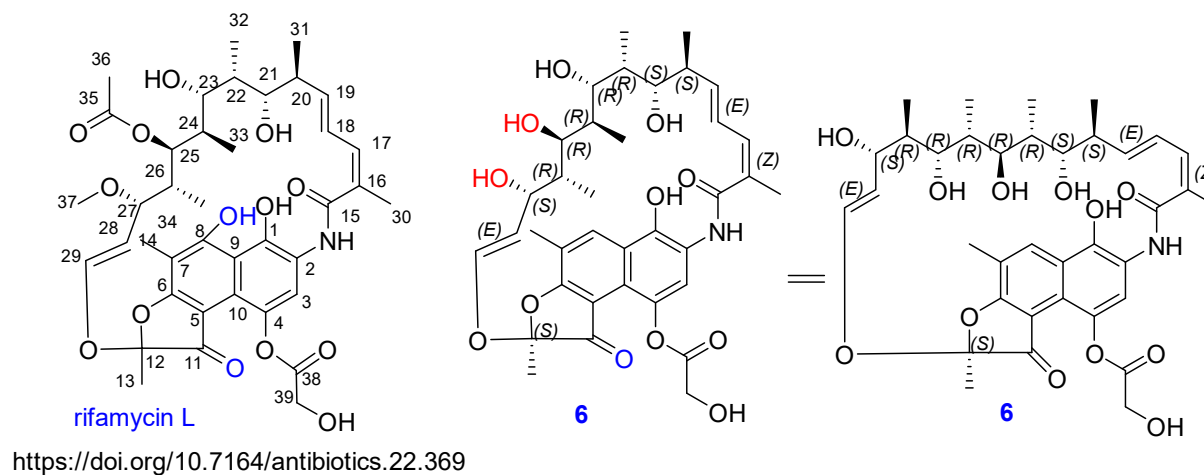

Figure S18. HRESIMS data of 6.

**Table S2.** Comparison of chemical shifts of **7** and **8**.

|    | Saliniketal A ( <b>8</b> ) |                             | <b>7</b>              |            |
|----|----------------------------|-----------------------------|-----------------------|------------|
| No | $\delta_C$                 | $\delta_H$                  | $\delta_H$            | $\delta_C$ |
| 1  | 175.1, qC                  |                             |                       | 175.1      |
| 2  | 131.4, qC                  |                             |                       | 131.4      |
| 3  | 134.1, CH                  | 6.17, br d (11.1, 1.2)      | 6.17, br d (11.1)     | 134.1      |
| 4  | 128.3, CH                  | 6.60, dd (15.3, 11.1)       | 6.58, dd (15.2, 11.1) | 128.3      |
| 5  | 142.0, CH                  | 5.78, dd (15.3, 8.4)        | 5.78, dd (15.2, 8.3)  | 142.1      |
| 6  | 42.3, CH                   | 2.35, m (9.3, 8.4, 6.8)     | 2.34, m               | 42.3       |
| 7  | 75.8, CH                   | 3.71, dd (9.3, 1.8)         | 3.73, dd (9.3, 1.3)   | 75.6       |
| 8  | 35.7, CH                   | 1.88, m (7.4, 4.9, 1.8)     | 1.89, m               | 36.3       |
| 9  | 78.2, CH                   | 3.52, dd (8.3, 4.9)         | 3.50, dd (7.9, 4.6)   | 78.9       |
| 10 | 37.1, CH                   | 1.84, br dq (8.3, 7.2, 1.4) | 1.81, m               | 38.5       |

|     |                       |                            |                      |       |
|-----|-----------------------|----------------------------|----------------------|-------|
| 11  | 74.9, CH              | 3.97, br d (10.8, 1.4)     | 4.05, dd (10.2, 1.2) | 83.5  |
| 12  | 35.2, CH              | 2.00, dqd (10.8, 7.3, 3.4) | 2.00, m              | 44.1  |
| 13  | 81.6, CH              | 4.23, br dd (6.3, 3.4)     | 3.46, t (8.4)        | 82.7  |
| 14a | 24.9, CH <sub>2</sub> | 1.94, m                    | 3.95, td (8.7, 3.5)  | 80.8  |
| 14b |                       | 1.90, m                    |                      |       |
| 15a | 35.1, CH <sub>2</sub> | 2.05, m                    | 2.75 dd (15.6, 3.5)  | 48.5  |
| 15b |                       | 1.80, m                    | 2.63 dd (15.6, 8.9)  |       |
| 16  | 106.4, qC             |                            |                      | 210.3 |
| 17  | 24.2, CH <sub>3</sub> | 1.39, s                    | 2.18, s              | 30.6  |
| 18  | 20.9, CH <sub>3</sub> | 1.94, d (1.2)              | 1.95, s              | 20.9  |
| 19  | 17.1, CH <sub>3</sub> | 0.96, d (6.8)              | 0.95, d (6.9)        | 17.1  |
| 20  | 11.1, CH <sub>3</sub> | 1.02, d (7.3)              | 0.98, d (7.0)        | 10.9  |
| 21  | 10.2, CH <sub>3</sub> | 0.89, d (7.2)              | 0.95, d (6.9)        | 10.6  |

|                                                 |                       |               |               |      |
|-------------------------------------------------|-----------------------|---------------|---------------|------|
| 22                                              | 12.8, CH <sub>3</sub> | 0.76, d (7.3) | 1.05, d (6.5) | 14.2 |
| <i>J. Nat. Prod.</i> <b>2007</b> , 70, 1, 83–88 |                       |               |               |      |

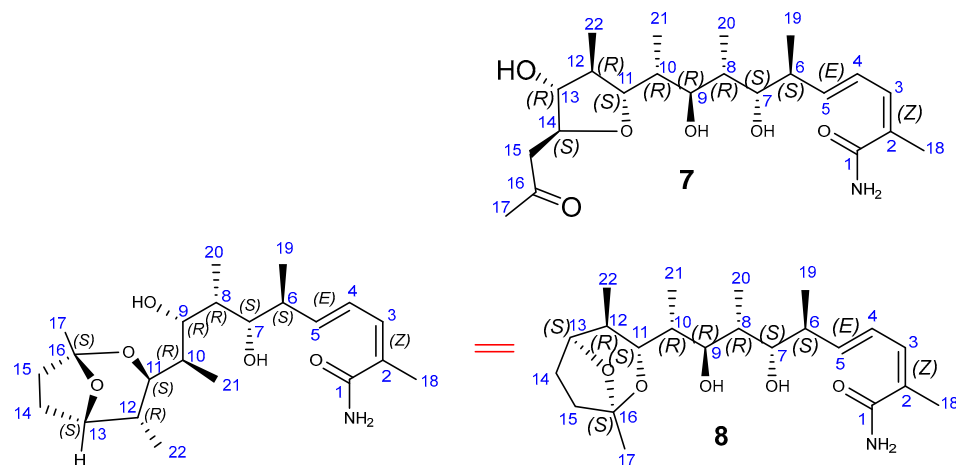

Structure of saliniketal A (**8**) drawn in different ways



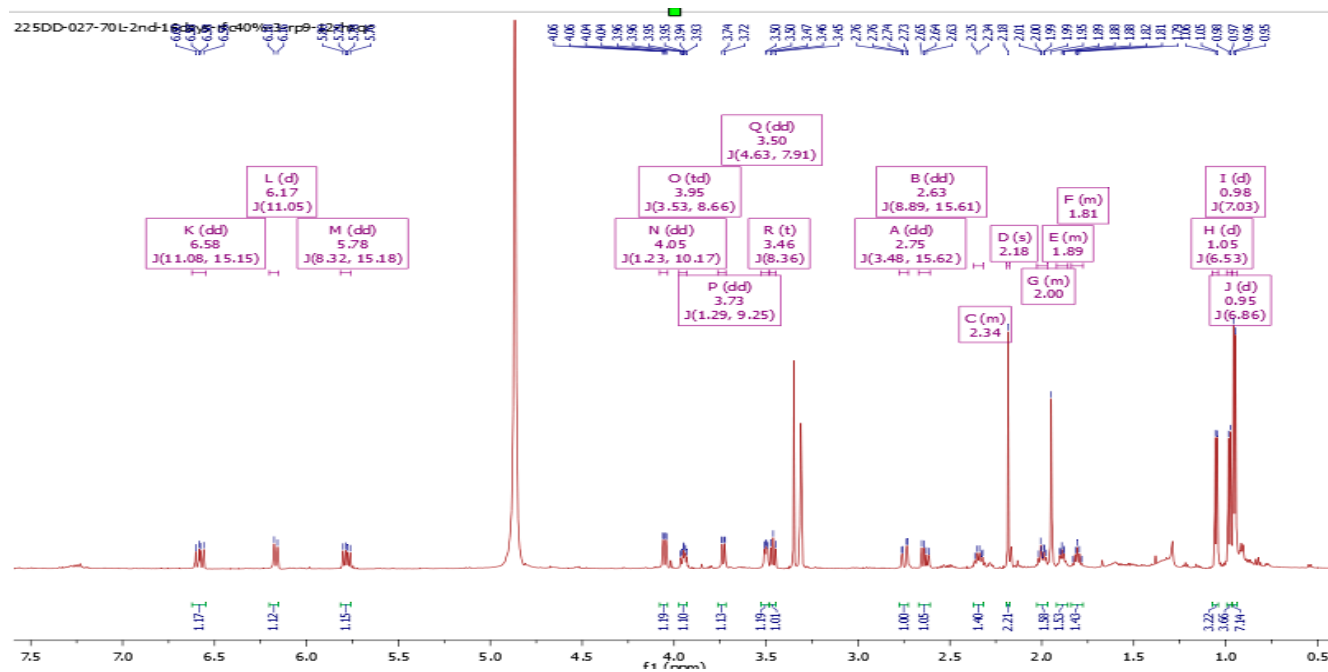

Figure S19.  $^1\text{H}$  NMR spectrum of **7**.

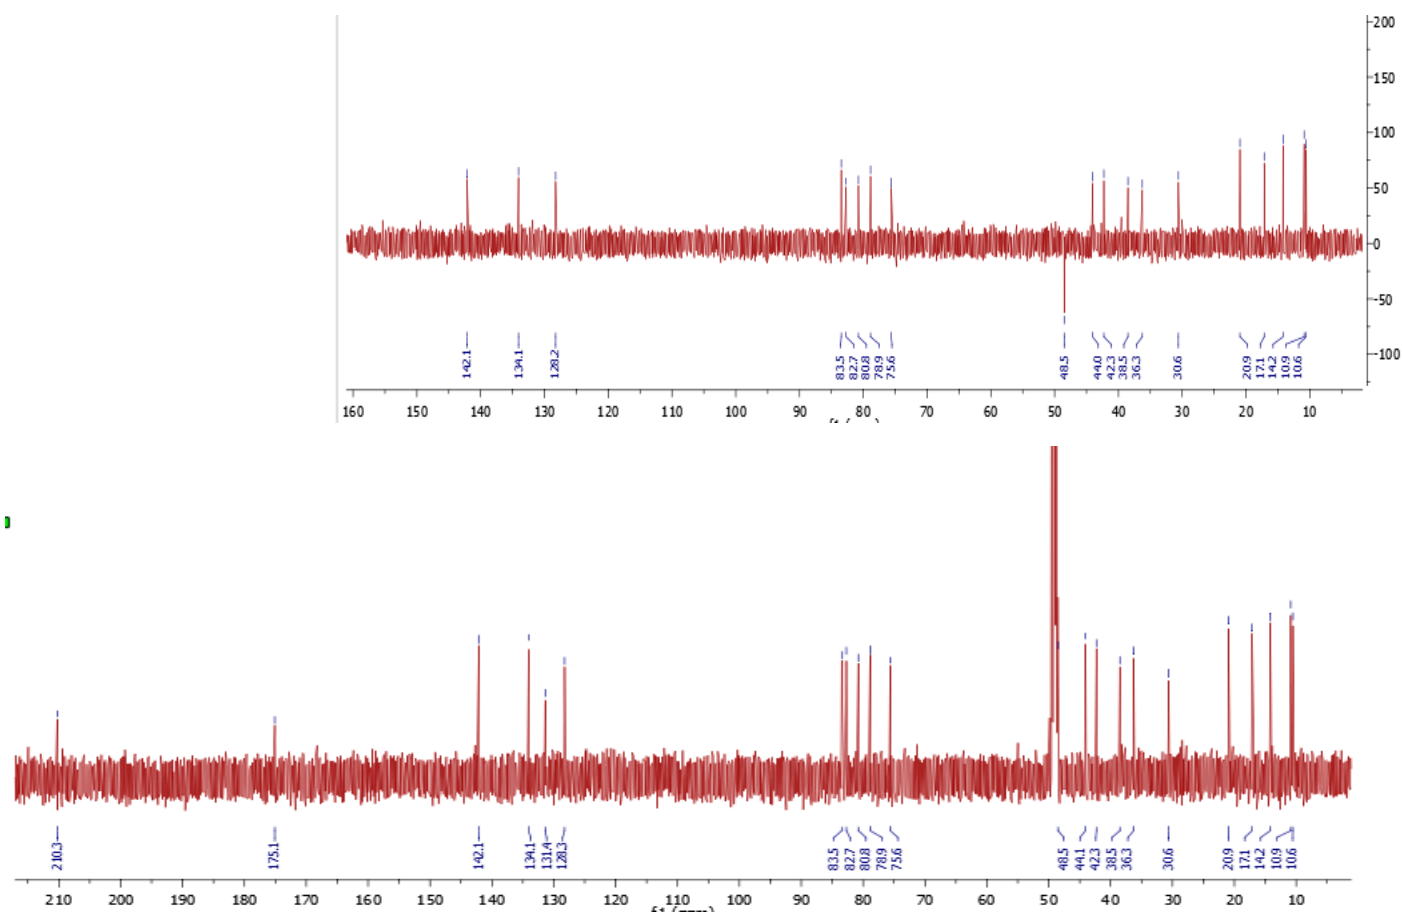

**Figure S20.**  $^{13}\text{C}$  NMR spectrum of 7.

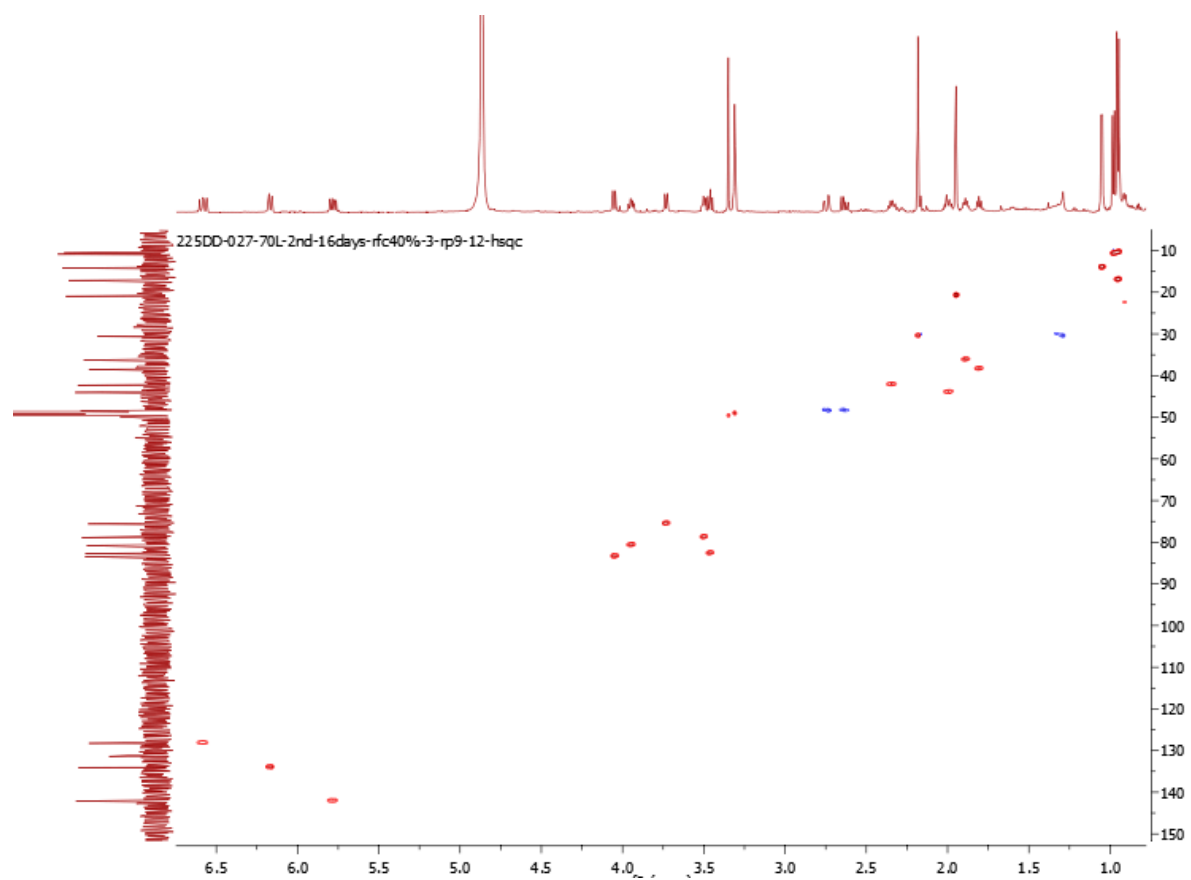

**Figure S21.** HSQC spectrum of **7**.

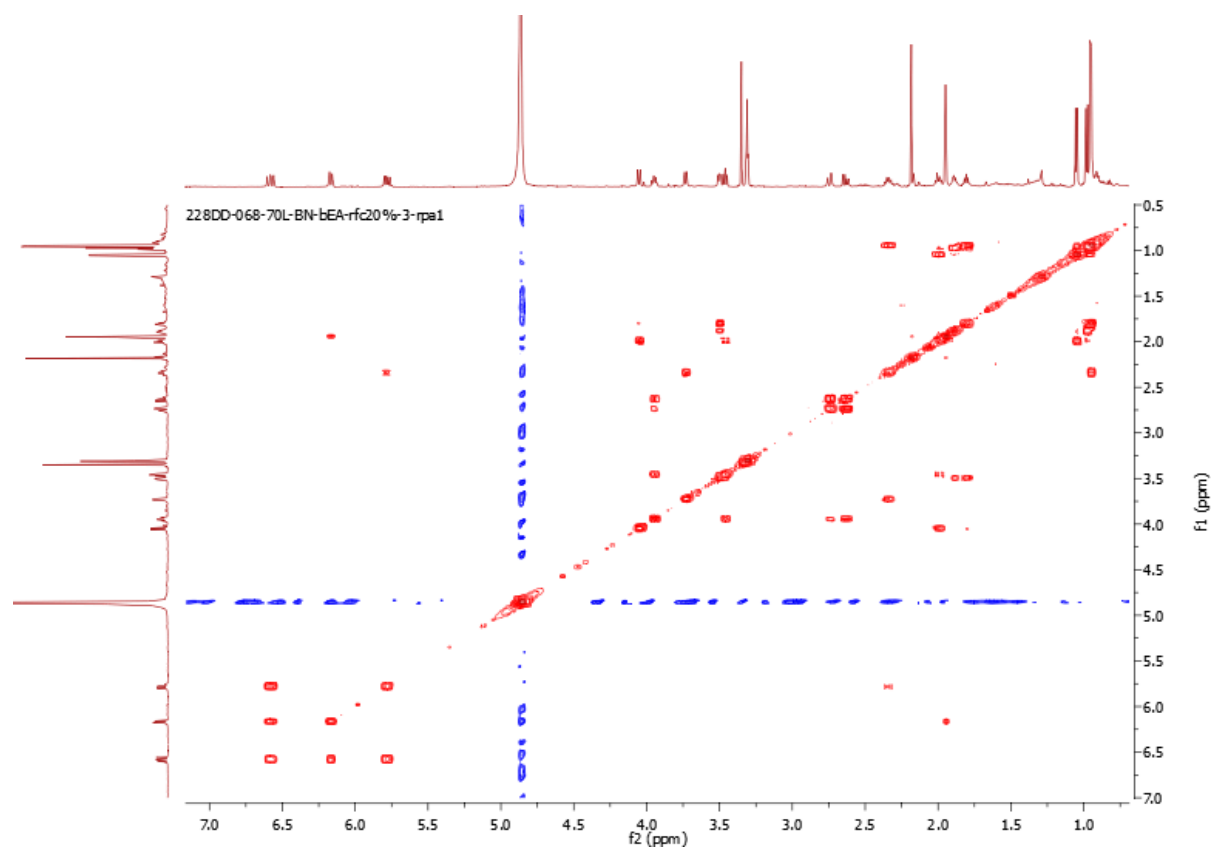

**Figure S22.**  $^1\text{H}$ - $^1\text{H}$  COSY spectrum of **7**.

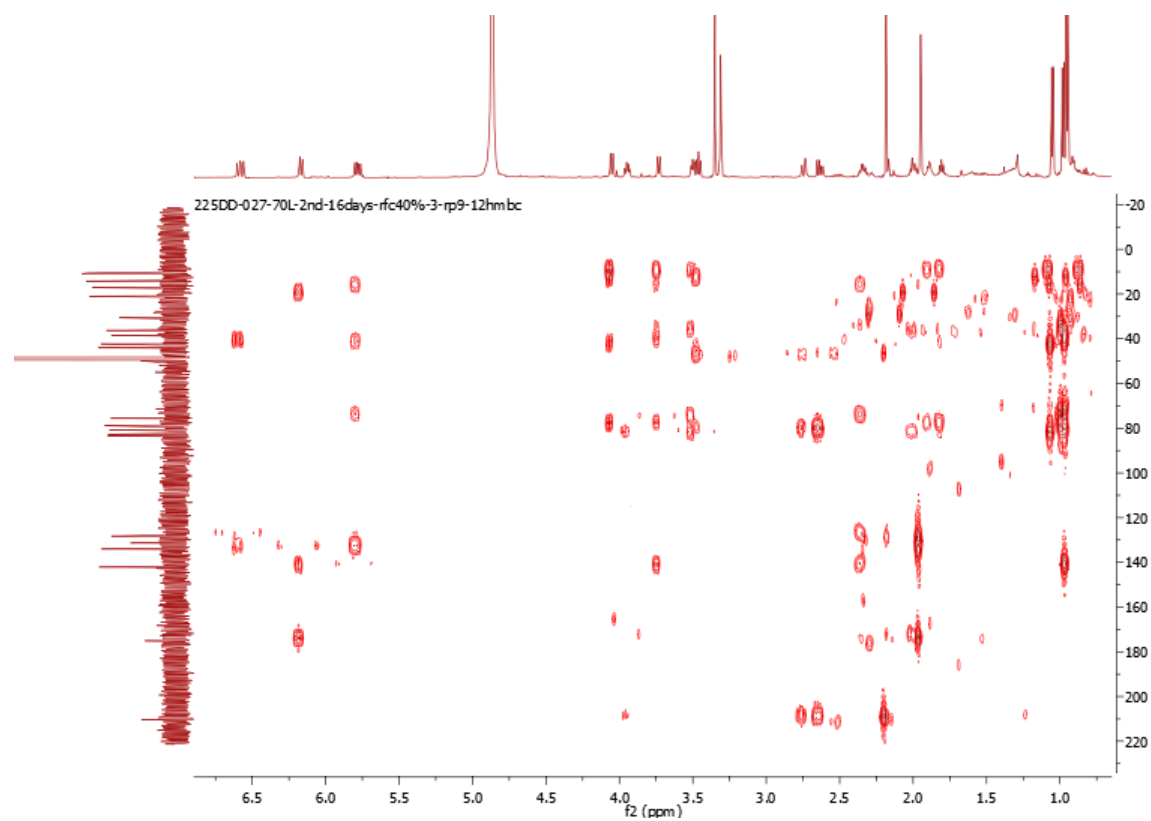

**Figure S23.** HMBC spectrum of **7**.

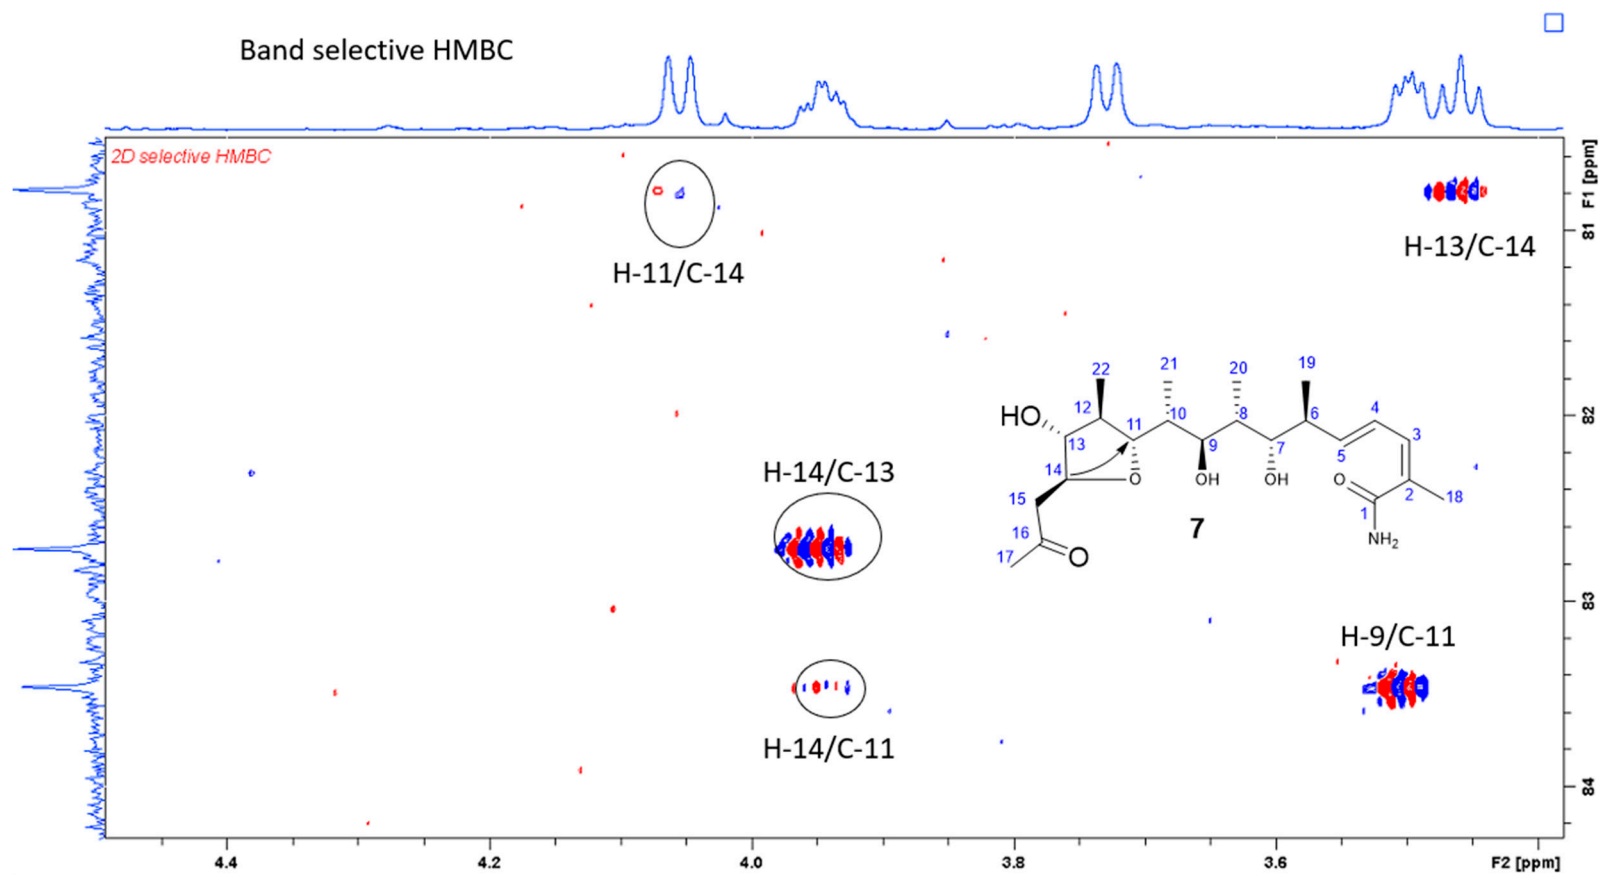

**Figure S24.** Band selective HMBC of 7.

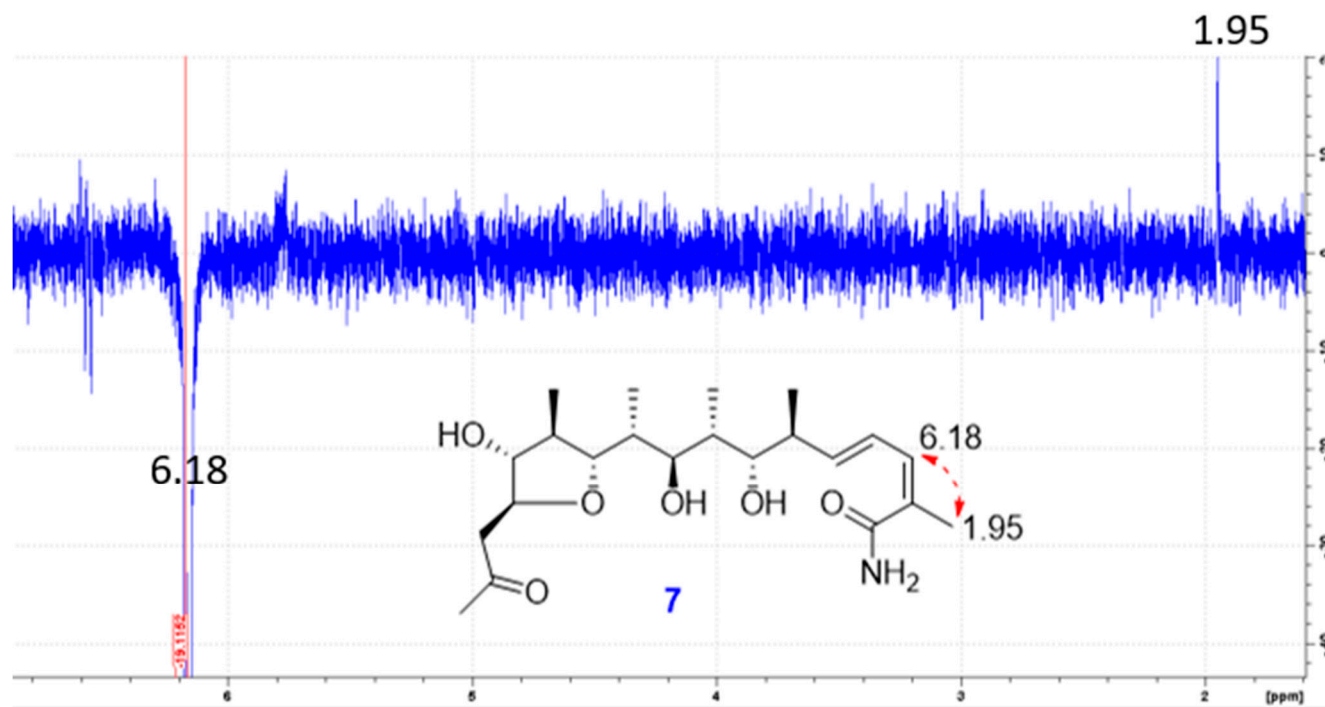

**Figure S25.** Selective 1D NOESY spectrum of **7** (irradiated at H-3).

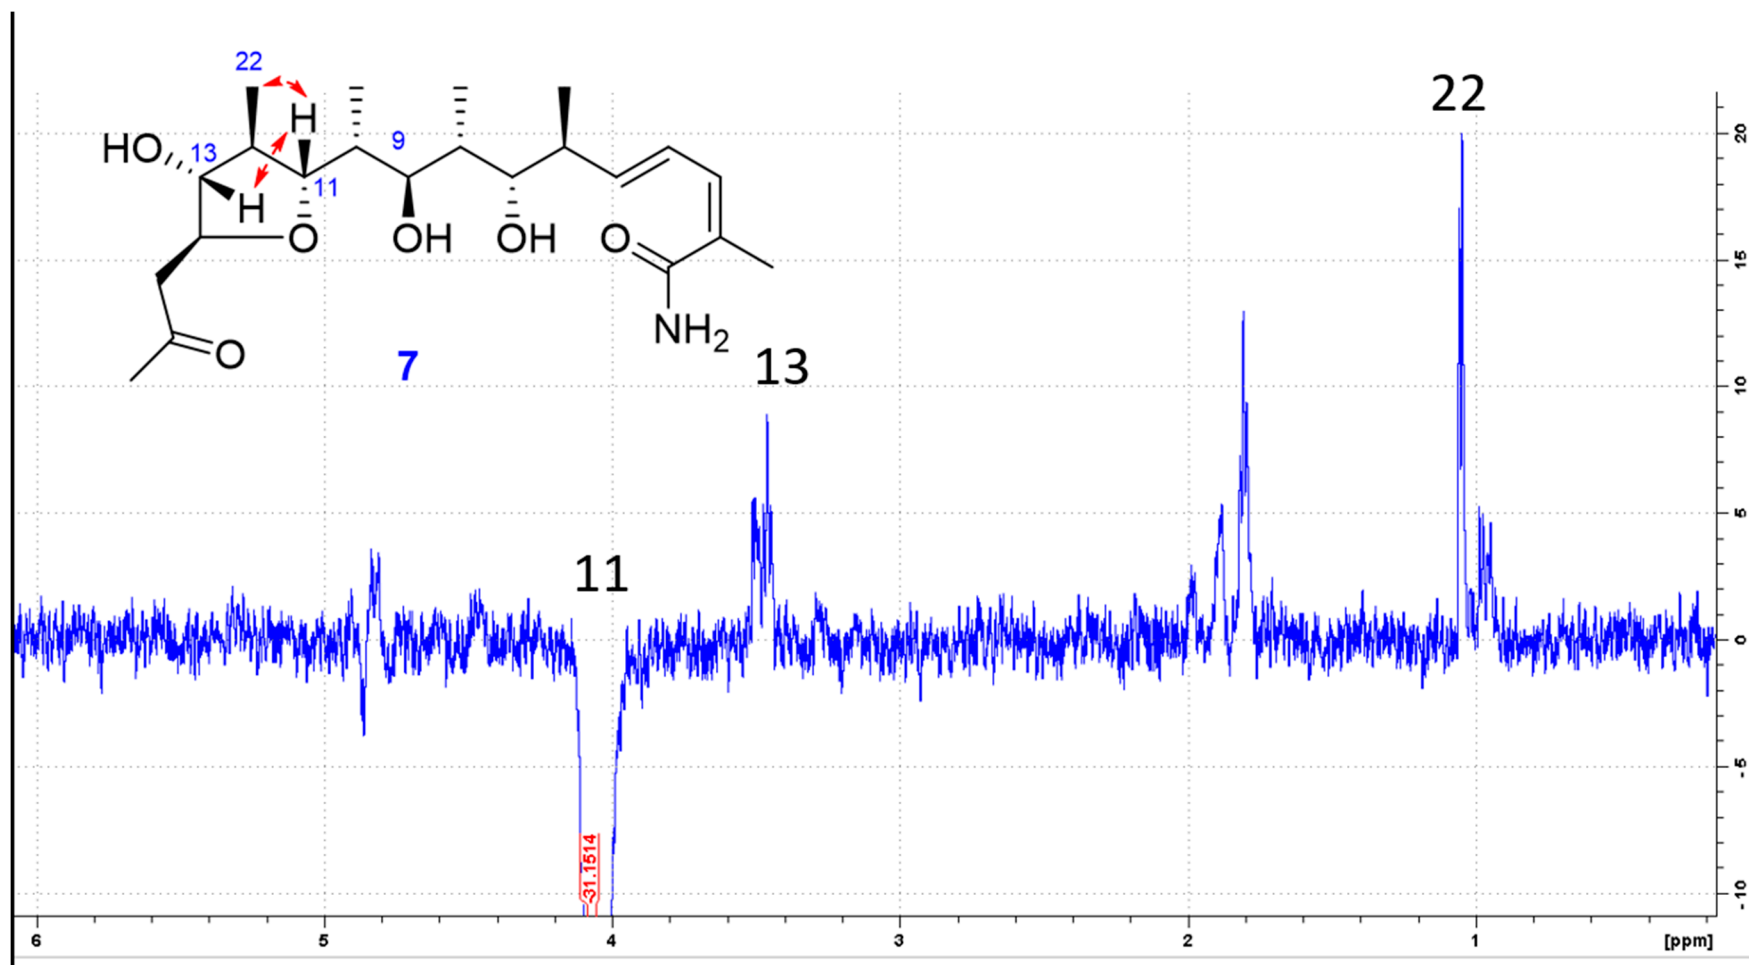

**Figure S26.** Selective 1D NOESY spectrum of **7** (irradiated at H-11).



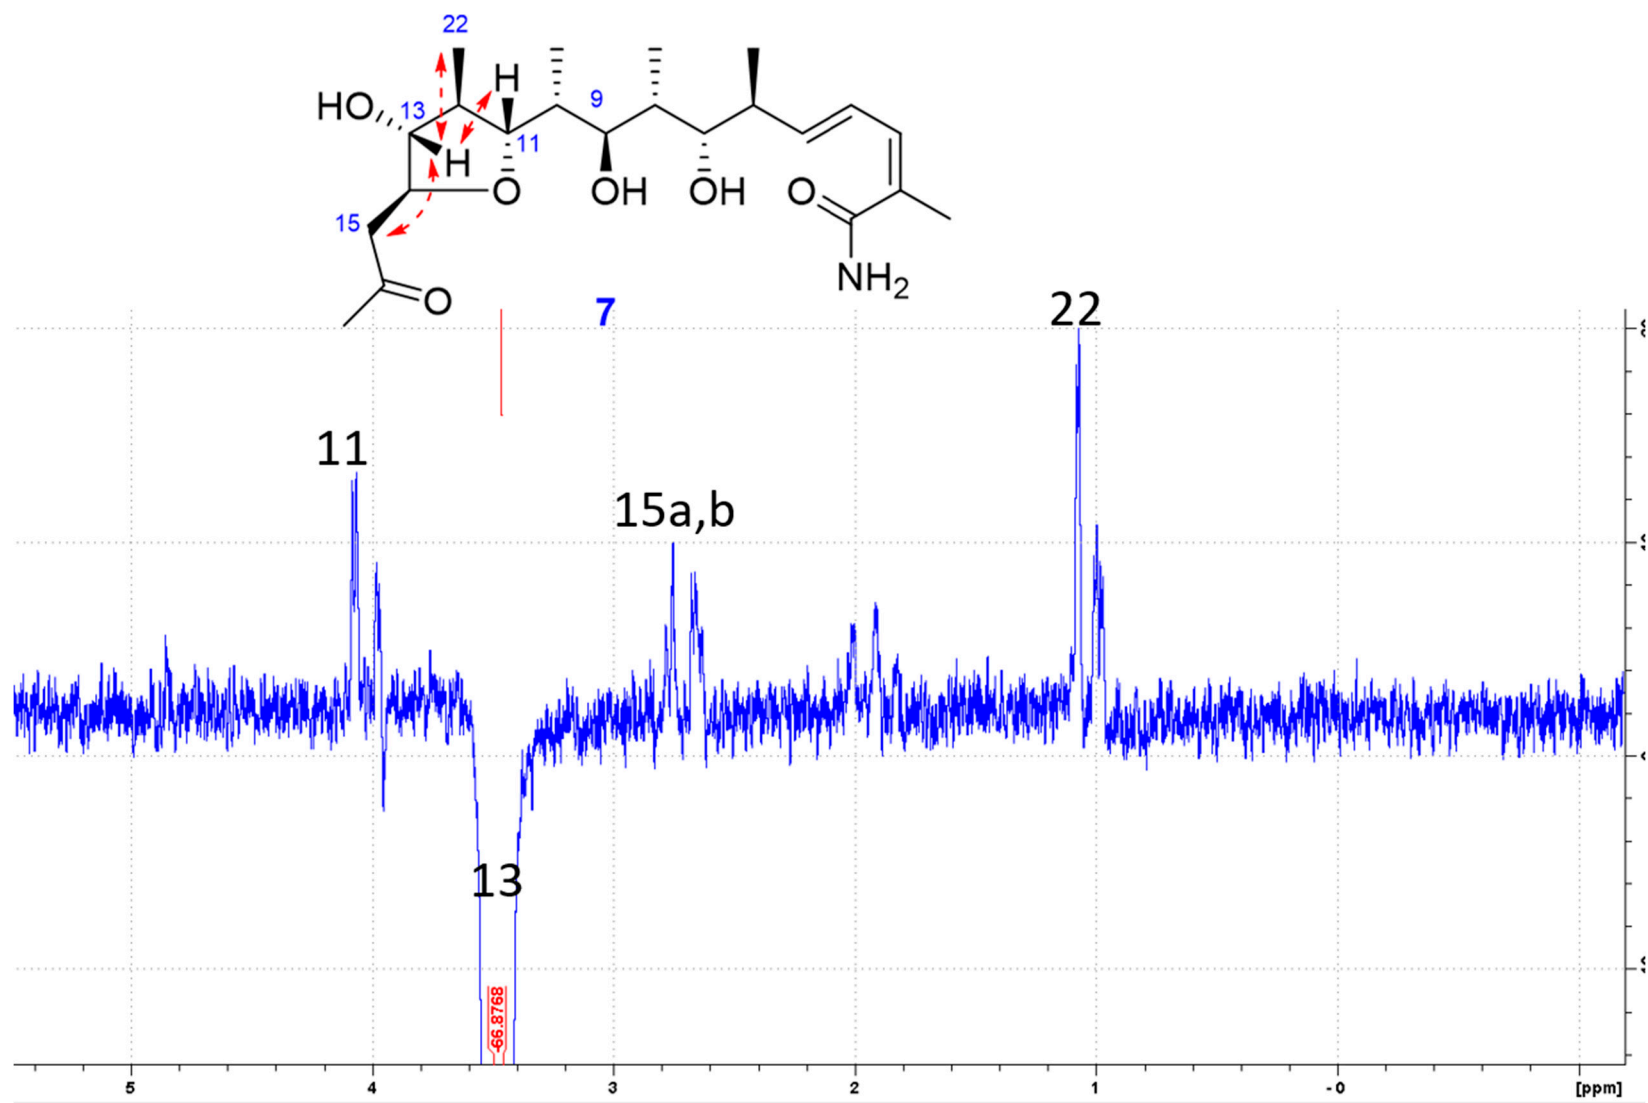

**Figure S27.** Selective 1D NOESY spectrum of **7** (irradiated at H-13).

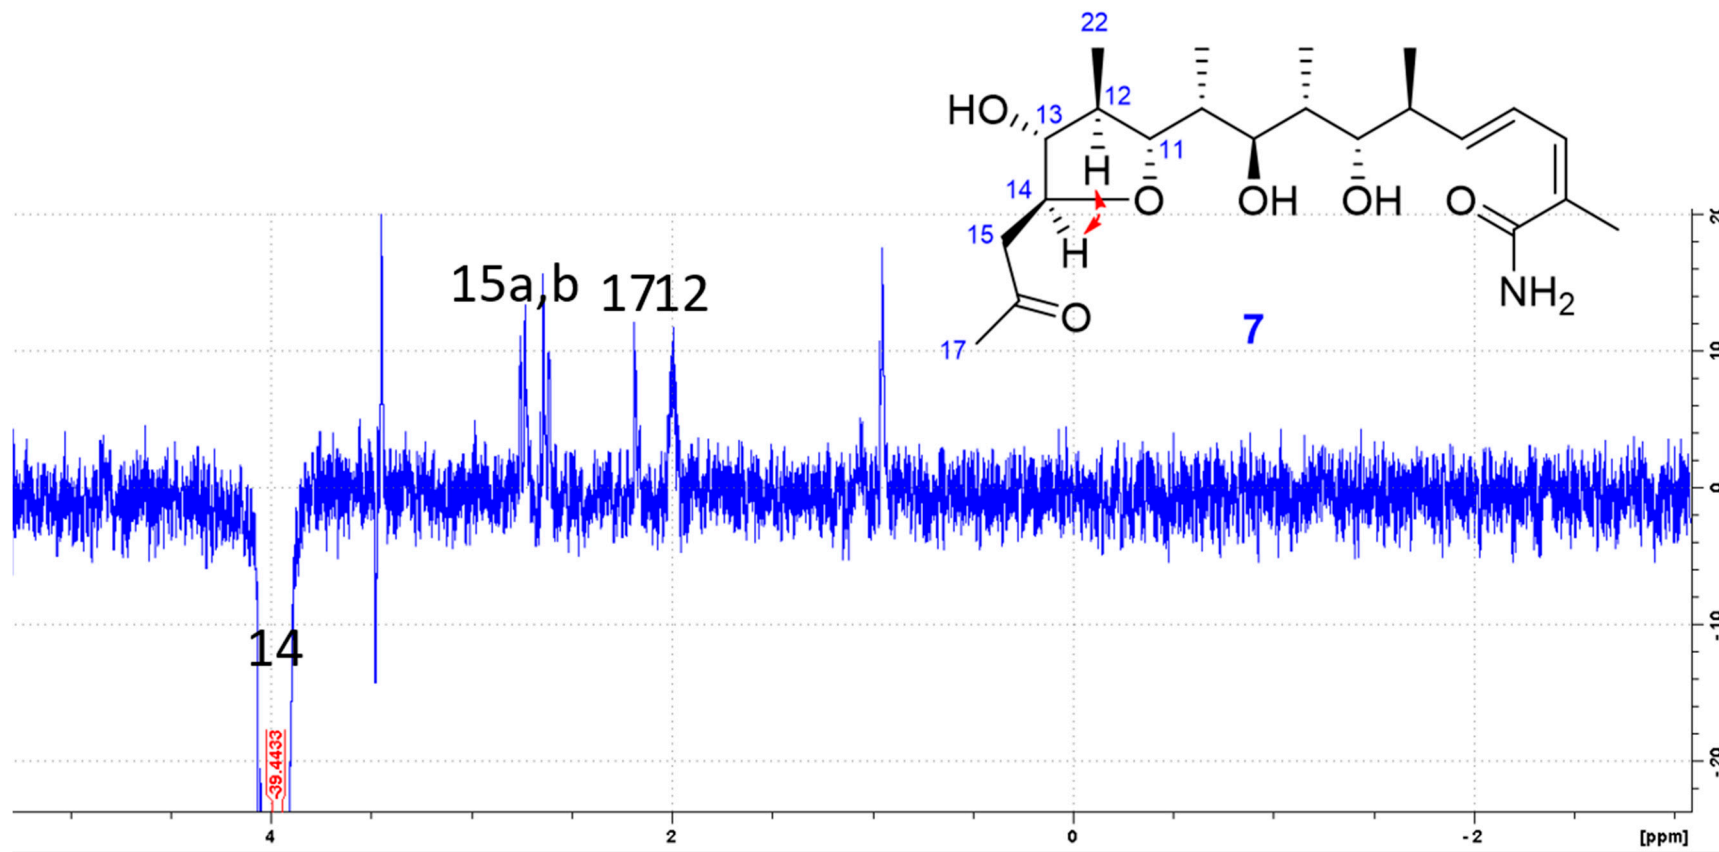

**Figure S28.** Selective 1D NOESY spectrum of **7** (irradiated at H-14).

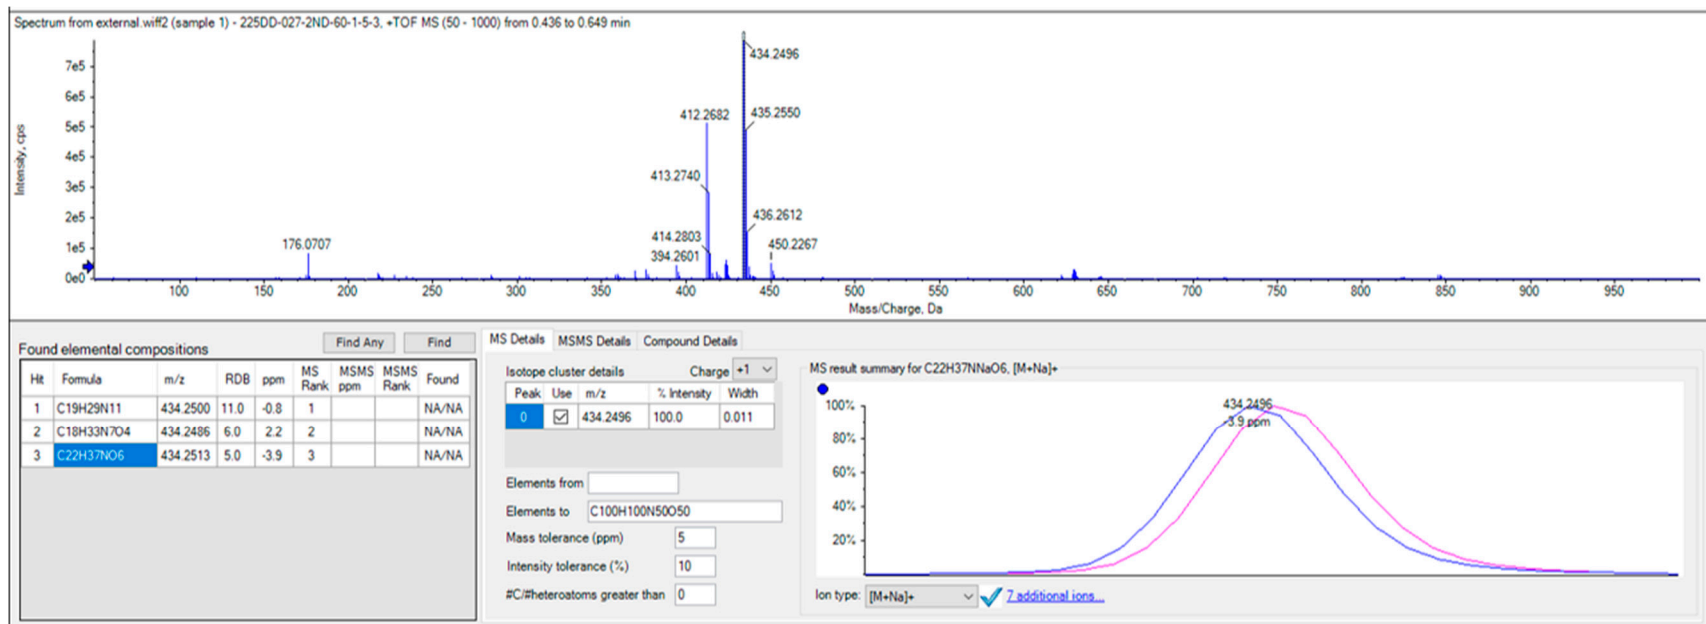

**Figure S29.** HRESIMS data of **7**.

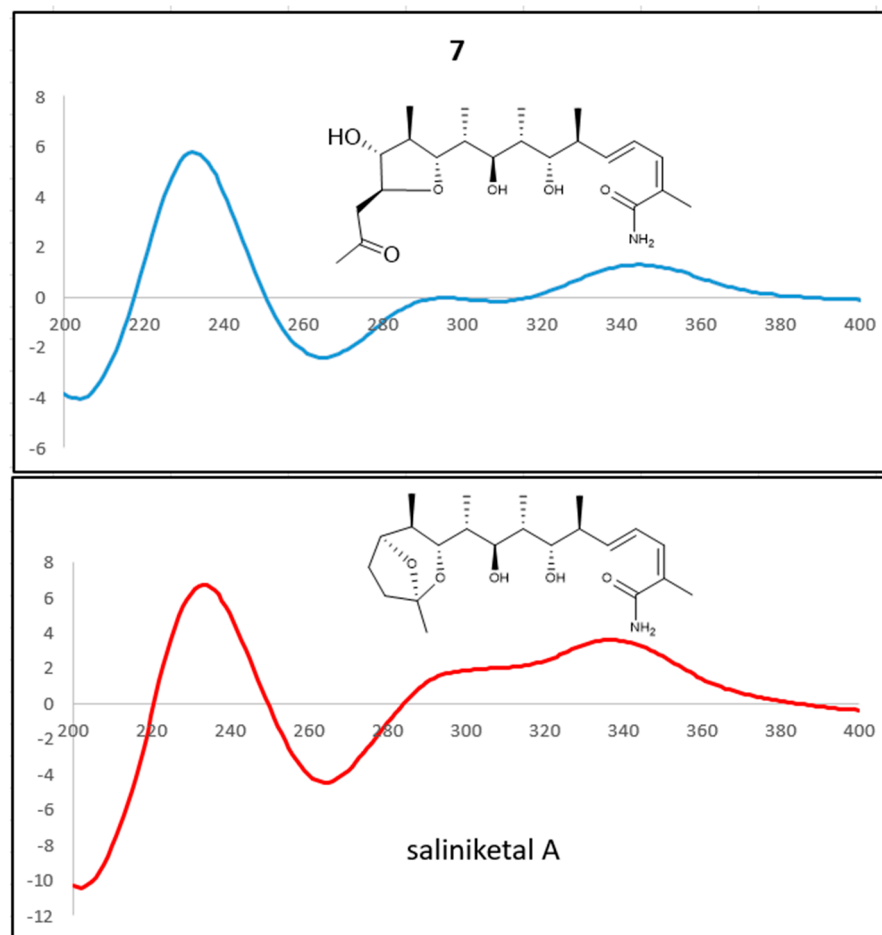

**Figure S30.** Comparison of ECD spectra of **7** and saliniketal A (**8**).

|              | ACHN       |      | MDA-MB-231 |      | HCT-15     |      | PC-3       |      | HUGC-3     |      | NCI-H-23   |      |
|--------------|------------|------|------------|------|------------|------|------------|------|------------|------|------------|------|
|              | 1          |      | 1          |      | 1          |      | 1          |      | 1          |      | 1          |      |
| Conc.(ug/ml) | Mean       | SD   |
| 30           | -13.46     | 8.64 | -10.07     | 4.32 | -11.13     | 8.02 | -14.02     | 5.97 | -19.37     | 6.64 | -12.90     | 5.30 |
| 10           | 26.00      | 2.26 | 31.39      | 4.33 | 27.32      | 8.81 | 16.40      | 6.58 | 14.23      | 5.85 | 17.31      | 2.11 |
| 3            | 78.78      | 6.67 | 79.19      | 3.07 | 83.64      | 4.91 | 87.18      | 4.75 | 80.37      | 6.25 | 82.95      | 5.40 |
| 1            | 95.06      | 2.45 | 84.64      | 1.61 | 92.23      | 2.59 | 89.97      | 4.10 | 89.69      | 3.56 | 92.41      | 5.11 |
| 0.3          | 97.49      | 1.54 | 93.76      | 3.48 | 96.06      | 8.91 | 95.96      | 5.73 | 92.55      | 9.68 | 97.80      | 4.00 |
| GI50         | 5.654      |      | 5.883      |      | 6.188      |      | 5.663      |      | 4.954      |      | 5.386      |      |
|              | ACHN       |      | MDA-MB-231 |      | HCT-15     |      | PC-3       |      | HUGC-3     |      | NCI-H-23   |      |
|              | 6          |      | 6          |      | 6          |      | 6          |      | 6          |      | 6          |      |
| Conc.(ug/ml) | Mean       | SD   |
| 30           | 29.55      | 5.88 | 34.66      | 0.97 | 22.09      | 6.38 | 32.58      | 5.93 | 29.32      | 3.65 | 22.47      | 5.78 |
| 10           | 88.28      | 5.86 | 82.39      | 1.74 | 76.73      | 3.91 | 72.30      | 6.97 | 84.25      | 5.81 | 74.24      | 5.17 |
| 3            | 96.37      | 1.05 | 85.81      | 2.02 | 84.79      | 4.55 | 85.59      | 8.45 | 90.44      | 4.68 | 77.79      | 6.95 |
| 1            | 97.29      | 1.47 | 89.28      | 2.86 | 92.10      | 6.24 | 91.40      | 3.21 | 95.38      | 4.52 | 89.49      | 3.79 |
| 0.3          | 99.42      | 1.20 | 92.83      | 4.13 | 97.94      | 5.71 | 97.78      | 6.39 | 97.61      | 4.36 | 98.55      | 2.98 |
| GI50         | 21.490     |      | 21.400     |      | 16.530     |      | 18.160     |      | 20.320     |      | 14.920     |      |
|              | ACHN       |      | MDA-MB-231 |      | HCT-15     |      | PC-3       |      | HUGC-3     |      | NCI-H-23   |      |
|              | 7          |      | 7          |      | 7          |      | 7          |      | 7          |      | 7          |      |
| Conc.(ug/ml) | Mean       | SD   |
| 30           | 79.41      | 6.71 | 79.78      | 3.07 | 72.88      | 2.97 | 79.47      | 4.05 | 88.30      | 7.14 | 77.86      | 9.12 |
| 10           | 83.99      | 2.29 | 85.56      | 6.09 | 79.84      | 6.60 | 82.70      | 3.50 | 89.97      | 6.94 | 83.44      | 1.85 |
| 3            | 88.54      | 3.57 | 89.28      | 3.22 | 86.79      | 5.49 | 88.82      | 3.01 | 92.02      | 8.35 | 87.30      | 4.02 |
| 1            | 95.88      | 4.10 | 91.42      | 2.64 | 90.40      | 6.92 | 94.55      | 1.09 | 94.12      | 4.90 | 91.13      | 3.09 |
| 0.3          | 98.47      | 1.70 | 94.17      | 4.83 | 94.93      | 3.28 | 98.76      | 1.90 | 98.55      | 6.28 | 100.24     | 4.15 |
| GI50         | >30        |      | >30        |      | >30        |      | >30        |      | >30        |      | >30        |      |
|              | ACHN       |      | MDA-MB-231 |      | HCT-15     |      | PC-3       |      | HUGC-3     |      | NCI-H-23   |      |
|              | 8          |      | 8          |      | 8          |      | 8          |      | 8          |      | 8          |      |
| Conc.(ug/ml) | Mean       | SD   |
| 30           | 80.26      | 6.78 | 79.05      | 5.44 | 82.57      | 3.96 | 78.99      | 2.29 | 81.37      | 6.38 | 77.78      | 6.01 |
| 10           | 86.73      | 5.41 | 83.58      | 6.20 | 86.97      | 2.07 | 84.29      | 5.13 | 84.62      | 3.27 | 81.08      | 4.17 |
| 3            | 88.73      | 4.08 | 87.41      | 6.25 | 88.66      | 7.40 | 93.69      | 2.14 | 88.33      | 4.19 | 90.00      | 5.81 |
| 1            | 91.61      | 3.69 | 93.24      | 4.06 | 93.93      | 4.79 | 95.44      | 3.10 | 90.40      | 6.87 | 92.95      | 3.16 |
| 0.3          | 93.50      | 4.29 | 98.34      | 1.89 | 98.23      | 4.60 | 97.19      | 7.22 | 98.63      | 2.06 | 95.22      | 3.67 |
| GI50         | >30        |      | >30        |      | >30        |      | >30        |      | >30        |      | >30        |      |
|              | ACHN       |      | MDA-MB-231 |      | HCT-15     |      | PC-3       |      | HUGC-3     |      | NCI-H-23   |      |
|              | Adriamycin |      | Adriamycin |      | Adriamycin |      | Adriamycin |      | Adriamycin |      | Adriamycin |      |
| Conc.(ug/ml) | Mean       | SD   |
| 3            | -13.13     | 4.26 | -8.64      | 6.13 | -9.58      | 3.03 | -14.29     | 5.14 | -11.86     | 3.47 | -10.30     | 3.82 |
| 1            | -4.84      | 6.22 | -4.95      | 3.59 | -6.92      | 8.80 | -5.59      | 6.05 | -7.22      | 4.40 | -5.08      | 7.60 |
| 0.3          | 25.58      | 5.44 | 19.22      | 3.95 | 18.41      | 4.90 | 19.63      | 5.72 | 10.89      | 4.93 | 16.13      | 5.48 |
| 0.1          | 37.47      | 5.75 | 38.11      | 4.01 | 29.95      | 6.43 | 32.60      | 3.18 | 25.42      | 8.11 | 37.27      | 6.81 |
| 0.03         | 93.78      | 7.62 | 91.89      | 1.94 | 91.35      | 5.00 | 90.91      | 3.33 | 97.32      | 3.78 | 89.45      | 4.32 |
| GI50         | 0.091      |      | 0.086      |      | 0.074      |      | 0.078      |      | 0.074      |      | 0.082      |      |

| 1                    | HL-60 |     | Raji |     | K562 |     | RPMI-8402 |     | NALM6 |     | U266 |     | WSU-DLCL2 |     |
|----------------------|-------|-----|------|-----|------|-----|-----------|-----|-------|-----|------|-----|-----------|-----|
| ( $\mu\text{g/ml}$ ) | MEAN  | SD  | MEAN | SD  | MEAN | SD  | MEAN      | SD  | MEAN  | SD  | MEAN | SD  | MEAN      | SD  |
| 30                   | 0.8   | 0.1 | 0.5  | 0.1 | 2.1  | 0.2 | 0.4       | 0.1 | 0.0   | 0.0 | 6.5  | 1.1 | 0.2       | 0.0 |
| 10                   | 38.9  | 2.3 | 8.9  | 0.7 | 30.4 | 2.6 | 11.5      | 0.5 | 7.5   | 3.3 | 18.2 | 1.2 | 9.0       | 0.6 |
| 3                    | 78.1  | 6.6 | 61.6 | 5.4 | 67.7 | 5.0 | 54.0      | 4.0 | 49.8  | 4.5 | 40.8 | 2.3 | 61.3      | 1.9 |
| 1                    | 88.2  | 8.0 | 87.5 | 7.3 | 84.8 | 2.7 | 85.6      | 4.2 | 83.5  | 2.5 | 64.7 | 4.4 | 60.1      | 6.6 |
| 0.3                  | 93.8  | 5.2 | 93.2 | 6.8 | 87.9 | 4.2 | 98.0      | 3.2 | 103.8 | 4.4 | 76.1 | 4.7 | 62.1      | 7.3 |
| IC50                 | 6.66  |     | 3.59 |     | 4.80 |     | 3.18      |     | 2.86  |     | 1.76 |     | 1.58      |     |

  

| 6                    | HL-60 |     | Raji  |     | K562 |     | RPMI-8402 |     | NALM6 |     | U266 |     | WSU-DLCL2 |     |
|----------------------|-------|-----|-------|-----|------|-----|-----------|-----|-------|-----|------|-----|-----------|-----|
| ( $\mu\text{g/ml}$ ) | MEAN  | SD  | MEAN  | SD  | MEAN | SD  | MEAN      | SD  | MEAN  | SD  | MEAN | SD  | MEAN      | SD  |
| 30                   | 0.0   | 0.0 | 0.0   | 0.0 | 0.0  | 0.0 | 0.0       | 0.0 | 0.0   | 0.0 | 0.0  | 0.0 | 0.0       | 0.0 |
| 10                   | 0.0   | 0.0 | 0.5   | 0.2 | 34.0 | 6.4 | 0.0       | 0.0 | 0.0   | 0.0 | 0.0  | 0.0 | 0.1       | 0.0 |
| 3                    | 60.1  | 1.1 | 123.3 | 3.3 | 79.5 | 3.0 | 22.1      | 2.7 | 58.3  | 2.1 | 23.8 | 5.2 | 68.8      | 2.5 |
| 1                    | 98.8  | 7.0 | 127.7 | 2.2 | 94.1 | 3.8 | 75.9      | 5.7 | 86.9  | 4.9 | 73.7 | 4.5 | 91.7      | 2.4 |
| 0.3                  | 104.4 | 6.0 | 109.5 | 5.9 | 95.7 | 3.6 | 92.8      | 3.6 | 87.2  | 9.8 | 81.1 | 9.6 | 88.6      | 2.4 |
| IC50                 | 3.27  |     | 8.23  |     | 6.51 |     | 1.67      |     | 3.25  |     | 1.57 |     | 3.69      |     |

  

| 7                    | HL-60 |     | Raji  |      | K562 |     | RPMI-8402 |     | NALM6 |     | U266  |     | WSU-DLCL2 |     |
|----------------------|-------|-----|-------|------|------|-----|-----------|-----|-------|-----|-------|-----|-----------|-----|
| ( $\mu\text{g/ml}$ ) | MEAN  | SD  | MEAN  | SD   | MEAN | SD  | MEAN      | SD  | MEAN  | SD  | MEAN  | SD  | MEAN      | SD  |
| 30                   | 60.3  | 6.0 | 179.9 | 19.8 | 86.8 | 3.0 | 47.7      | 5.5 | 6.5   | 7.9 | 74.0  | 2.5 | 63.1      | 3.0 |
| 10                   | 101.9 | 5.9 | 249.6 | 15.2 | 96.2 | 2.1 | 90.1      | 3.2 | 56.7  | 5.2 | 95.0  | 3.8 | 114.6     | 3.9 |
| 3                    | 102.2 | 4.7 | 191.0 | 5.6  | 97.4 | 2.7 | 100.2     | 3.3 | 104.1 | 4.8 | 100.9 | 5.9 | 111.8     | 3.9 |
| 1                    | 102.4 | 3.5 | 126.7 | 12.2 | 95.8 | 2.1 | 95.2      | 4.3 | 99.5  | 3.1 | 94.6  | 1.2 | 98.0      | 0.7 |
| 0.3                  | 97.3  | 3.8 | 91.4  | 6.4  | 94.2 | 2.2 | 92.4      | 7.4 | 93.7  | 7.7 | 94.6  | 9.1 | 91.5      | 5.9 |
| IC50                 | >30   |     | >30   |      | >30  |     | 28.70     |     | 11.00 |     | >30   |     | >30       |     |

  

| 8                    | HL-60 |     | Raji  |     | K562  |     | RPMI-8402 |     | NALM6 |     | U266  |     | WSU-DLCL2 |     |
|----------------------|-------|-----|-------|-----|-------|-----|-----------|-----|-------|-----|-------|-----|-----------|-----|
| ( $\mu\text{g/ml}$ ) | MEAN  | SD  | MEAN  | SD  | MEAN  | SD  | MEAN      | SD  | MEAN  | SD  | MEAN  | SD  | MEAN      | SD  |
| 30                   | 87.9  | 1.7 | 137.3 | 4.1 | 81.2  | 1.6 | 89.4      | 4.0 | 86.6  | 6.6 | 87.2  | 1.3 | 120.6     | 2.8 |
| 10                   | 94.8  | 5.6 | 140.1 | 5.1 | 96.8  | 1.8 | 102.3     | 6.4 | 101.3 | 3.4 | 93.0  | 5.2 | 135.0     | 6.2 |
| 3                    | 95.0  | 2.2 | 124.0 | 9.3 | 101.6 | 3.7 | 109.5     | 2.8 | 102.0 | 4.6 | 101.2 | 6.7 | 117.9     | 1.8 |
| 1                    | 97.2  | 2.1 | 116.1 | 4.9 | 105.0 | 2.8 | 105.0     | 7.3 | 104.0 | 4.6 | 92.6  | 3.9 | 112.5     | 4.5 |
| 0.3                  | 95.7  | 3.2 | 92.7  | 3.1 | 102.3 | 2.2 | 104.3     | 5.3 | 102.6 | 2.8 | 94.4  | 4.9 | 104.8     | 1.9 |
| IC50                 | >30   |     | >30   |     | >30   |     | >30       |     | >30   |     | >30   |     | >30       |     |

  

| Adr.              | HL-60 |     | Raji  |     | K562  |     | RPMI-8402 |     | NALM6 |     | U266  |     | WSU-DLCL2 |     |
|-------------------|-------|-----|-------|-----|-------|-----|-----------|-----|-------|-----|-------|-----|-----------|-----|
| ( $\mu\text{M}$ ) | MEAN  | SD  | MEAN  | SD  | MEAN  | SD  | MEAN      | SD  | MEAN  | SD  | MEAN  | SD  | MEAN      | SD  |
| 1                 |       |     |       |     | 4.3   | 0.3 |           |     |       |     |       |     |           |     |
| 0.3               |       |     |       |     | 7.3   | 0.5 |           |     |       |     |       |     |           |     |
| 0.1               | 1.9   | 0.2 | 0.2   | 0.1 | 46.8  | 1.9 | 0.7       | 0.1 | 0.0   | 0.0 | 9.6   | 0.7 | 0.3       | 0.1 |
| 0.03              | 35.9  | 2.0 | 2.4   | 0.7 | 65.9  | 3.7 | 8.2       | 1.4 | 0.0   | 0.0 | 57.4  | 2.6 | 4.5       | 0.4 |
| 0.01              | 77.8  | 4.8 | 32.8  | 1.3 | 76.3  | 2.9 | 71.4      | 4.1 | 0.1   | 0.0 | 90.1  | 3.2 | 10.4      | 1.1 |
| 0.003             | 96.8  | 8.6 | 50.5  | 5.4 |       |     | 88.8      | 5.8 | 43.5  | 3.4 | 86.9  | 8.4 | 42.7      | 4.1 |
| 0.001             | 95.7  | 8.8 | 62.9  | 5.3 |       |     | 103.6     | 7.4 | 80.1  | 2.9 | 85.9  | 2.3 | 60.5      | 4.9 |
| IC50              | 0.021 |     | 0.003 |     | 0.057 |     | 0.014     |     | 0.002 |     | 0.034 |     | 0.002     |     |

| RPMI-1788  | Doxorubicin |     | RPMI-1788     | 6      |     | 1      |     |
|------------|-------------|-----|---------------|--------|-----|--------|-----|
| ( $\mu$ M) | MEAN        | SD  | ( $\mu$ g/ml) | MEAN   | SD  | MEAN   | SD  |
| 0.3        | 0.8         | 0.1 | 30            | 0.0    | 0.0 | 0.4    | 0.0 |
| 0.1        | 6.8         | 0.6 | 10            | 0.2    | 0.0 | 20.5   | 0.7 |
| 0.03       | 29.4        | 1.2 | 3             | 74.4   | 1.7 | 81.1   | 2.7 |
| 0.01       | 55.7        | 3.1 | 1             | 101.9  | 5.4 | 109.0  | 2.8 |
| 0.003      | 92.2        | 5.8 | 0.3           | 100.6  | 9.2 | 112.5  | 4.9 |
| IC50       | 0.014       |     | IC50          | 3.366  |     | 5.669  |     |
|            |             |     | IC50 $\mu$ M  | 4.9283 |     | 8.4738 |     |

|            | 1<br>( $\mu$ M) | 1<br>( $\mu$ g/ml) | 6<br>( $\mu$ M) | 6<br>( $\mu$ g/ml) | 7<br>( $\mu$ M) | 7<br>( $\mu$ g/ml) | 8<br>( $\mu$ M) | 8<br>( $\mu$ g/ml) | Adr.<br>( $\mu$ M) | Adr.<br>( $\mu$ g/ml) |
|------------|-----------------|--------------------|-----------------|--------------------|-----------------|--------------------|-----------------|--------------------|--------------------|-----------------------|
| ACHN       | 8.45            | 5.654              | > 30            | 21.490             | > 30            | > 30               | > 30            | > 30               | 0.168              | 0.091                 |
| MDA-MB-231 | 8.79            | 5.883              | > 30            | 21.400             | > 30            | > 30               | > 30            | > 30               | 0.159              | 0.086                 |
| HCT-15     | 9.25            | 6.188              | 24.2            | 16.530             | > 30            | > 30               | > 30            | > 30               | 0.137              | 0.074                 |
| PC-3       | 8.46            | 5.663              | 26.59           | 18.160             | > 30            | > 30               | > 30            | > 30               | 0.144              | 0.078                 |
| NUGC-3     | 7.41            | 4.954              | 29.75           | 20.320             | > 30            | > 30               | > 30            | > 30               | 0.136              | 0.074                 |
| NCI-H23    | 8.05            | 5.386              | 21.84           | 14.920             | > 30            | > 30               | > 30            | > 30               | 0.151              | 0.082                 |
| HL-60      | 9.96            | 6.66               | 4.79            | 3.27               | > 30            | > 30               | > 30            | > 30               | 0.021              | 0.011                 |
| Raji       | 5.37            | 3.59               | 12.05           | 8.23               | > 30            | > 30               | > 30            | > 30               | 0.003              | 0.002                 |
| K562       | 7.17            | 4.80               | 9.53            | 6.51               | > 30            | > 30               | > 30            | > 30               | 0.057              | 0.031                 |
| RPMI-8402  | 4.75            | 3.18               | 2.45            | 1.67               | > 30            | 28.70              | > 30            | > 30               | 0.014              | 0.008                 |
| NALM6      | 4.28            | 2.86               | 4.76            | 3.25               | 26.76           | 11.00              | > 30            | > 30               | 0.002              | 0.001                 |
| U266       | 2.63            | 1.76               | 2.30            | 1.57               | > 30            | > 30               | > 30            | > 30               | 0.034              | 0.018                 |
| WSU-DLCL2  | 2.36            | 1.58               | 5.40            | 3.69               | > 30            | > 30               | > 30            | > 30               | 0.002              | 0.001                 |
| RPMI-1788  | 8.47            | 5.67               | 4.93            | 3.37               | nt              | nt                 | nt              | nt                 | 0.014              | 0.008                 |

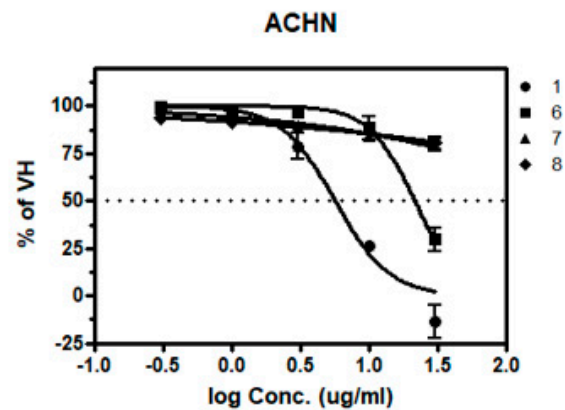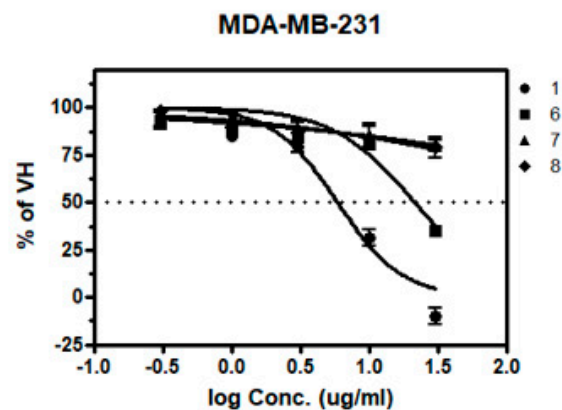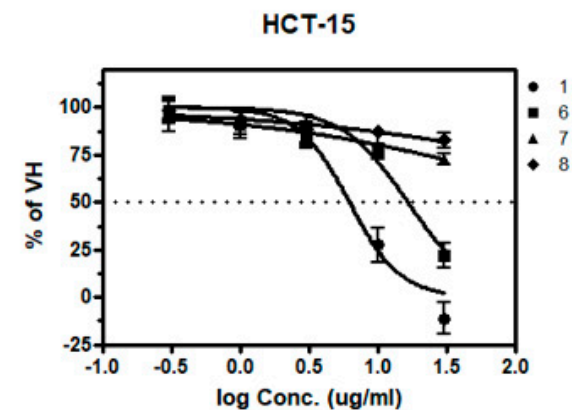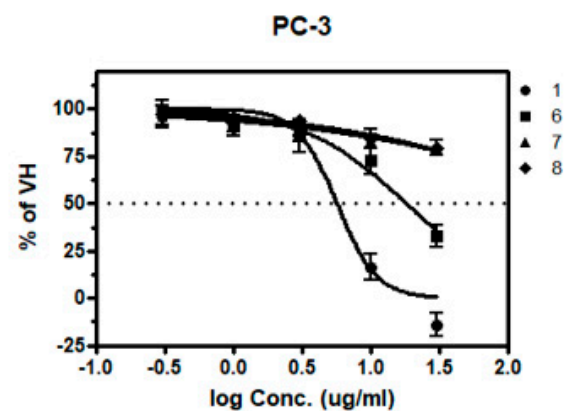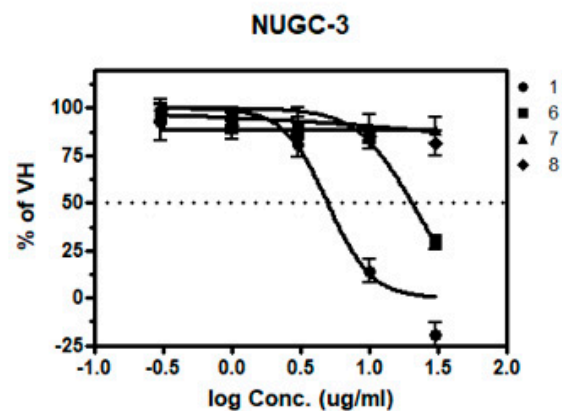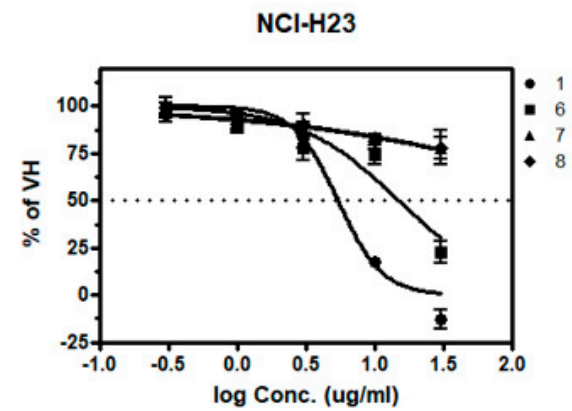



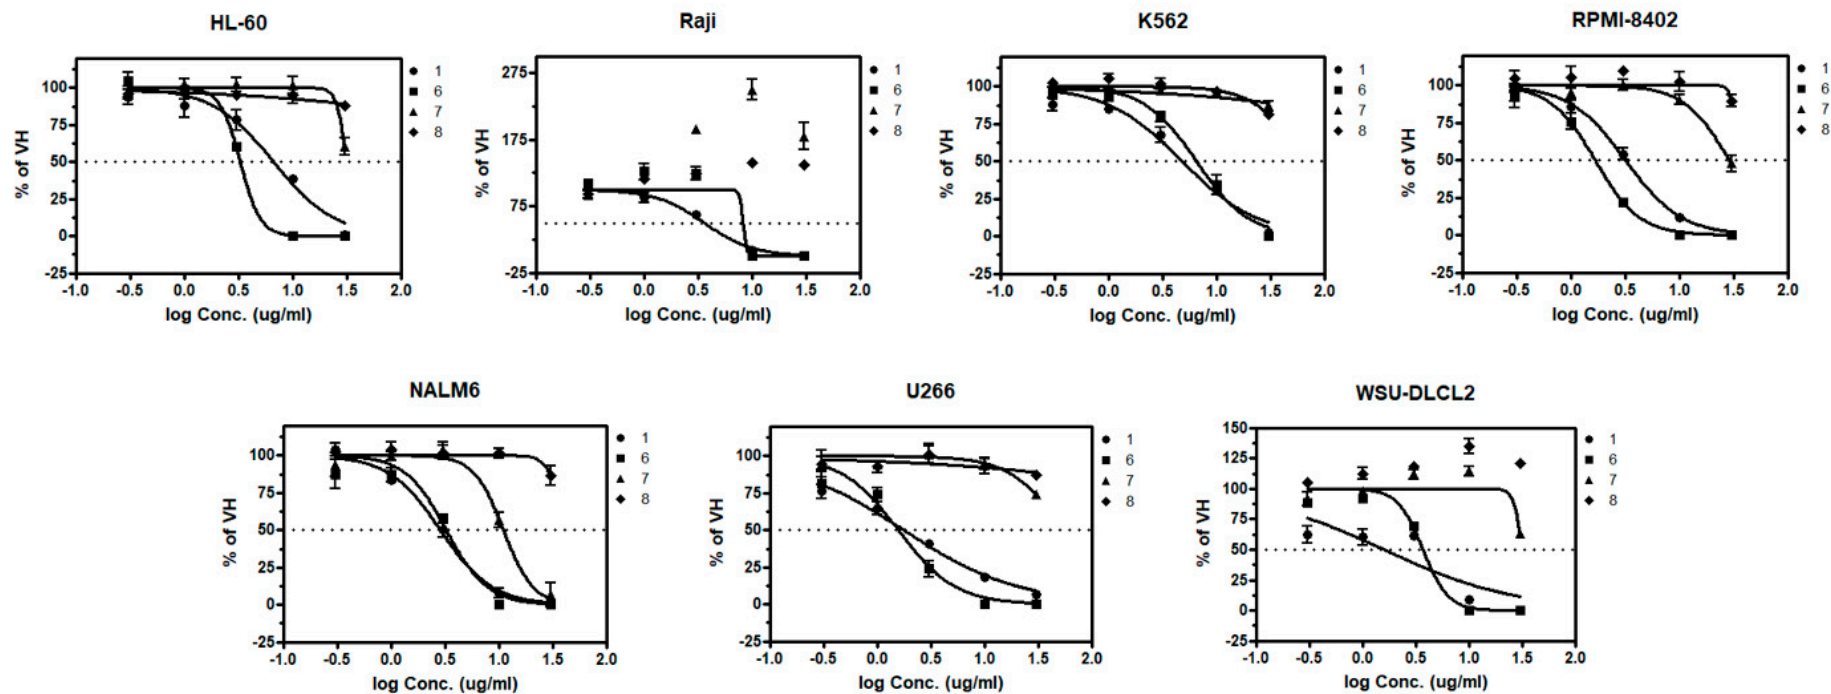

**Figure S31.** Results of cytotoxicity test and dose-response curves for compounds 1 and 6-8.
